# Supplementary material for: Proteomic Analysis of Niemann-Pick Type C Hepatocytes Reveals Potential Therapeutic Targets for Liver Damage
Source: MDPI journal article supplement (doi:10.3390/cells10082159), 2021-08-21
Supplement: s1 [file s1]

**Table 3.** The most differentially regulated proteins with log<sub>2</sub> fold change >2 and log<sub>2</sub> fold change <-1 classified by locations and types.

| Symbol   | Entrez Gene Name                                 | Log <sub>2</sub> Fold Change<br>npc/wt | Location            | Type(s)                |
|----------|--------------------------------------------------|----------------------------------------|---------------------|------------------------|
| Mup22    | Major urinary protein 22                         | -2,829                                 | Extracellular Space | transporter            |
| NPC1     | NPC intracellular cholesterol transporter 1      | -1,934                                 | Cytoplasm           | transporter            |
| NUDT7    | Nudix hydrolase 7                                | -1,919                                 | Cytoplasm           | enzyme                 |
| Mup1     | Major urinary protein 1                          | -1,360                                 | Extracellular Space | transporter            |
| COMT     | Catechol-O-methyltransferase                     | -1,318                                 | Cytoplasm           | enzyme                 |
| HSD17B2  | Hydroxysteroid 17-beta dehydrogenase 2           | -1,240                                 | Cytoplasm           | enzyme                 |
| LAMP1    | Lysosomal associated membrane protein 1          | 2,067                                  | Lysosomal Membrane  | Other                  |
| GNG2     | G protein subunit gamma 2                        | 2,083                                  | Plasma Membrane     | enzyme                 |
| ITGB2    | Integrin subunit beta 2                          | 2,089                                  | Plasma Membrane     | transmembrane receptor |
| ANXA1    | Annexin A1                                       | 2,165                                  | Plasma Membrane     | enzyme                 |
| MMP12    | Matrix metalloproteinase 12                      | 2,172                                  | Extracellular Space | peptidase              |
| SLC43A2  | Solute carrier family 43 member 2                | 2,234                                  | Plasma Membrane     | transporter            |
| ATP6V0D2 | ATPase H <sup>+</sup> transporting V0 subunit d2 | 2,280                                  | Cytoplasm           | transporter            |
| LILRB4   | Leukocyte immunoglobulin like receptor B4        | 2,300                                  | Plasma Membrane     | Other                  |
| FABP4    | Fatty acid binding protein 4                     | 2,323                                  | Cytoplasm           | transporter            |
| SLC66A3  | Solute carrier family 66 member 3                | 2,361                                  | Other               | Other                  |
| CTSS     | Cathepsin S                                      | 2,371                                  | Cytoplasm           | peptidase              |
| SLC37A2  | Solute carrier family 37 member 2                | 2,375                                  | Cytoplasm           | transporter            |
| S100A1   | S100 calcium binding protein A1                  | 2,659                                  | Cytoplasm           | Other                  |
| LEPROT   | Leptin receptor overlapping transcript           | 2,744                                  | Plasma Membrane     | Other                  |
| CD200    | CD200 molecule                                   | 2,890                                  | Plasma Membrane     | Other                  |
