# Supplementary material for: Proteomic Analysis of Niemann-Pick Type C Hepatocytes Reveals Potential Therapeutic Targets for Liver Damage
Source: Cells. 2021 Aug 21;10(8):2159. doi: 10.3390/cells10082159 (PMC8392304; doi:10.3390/cells10082159)
Supplement: Supplementary file 1 [file cells-10-02159-s001.zip]

Archive with 4 entries (4 files):
- Supplementary Table_1.xlsx
- Supplementary Table_2.xlsx
- Supplementary Table_3.pdf
- Supplementary Table_4.xlsx
