# Supplementary material for: Proteomic Analysis of Niemann-Pick Type C Hepatocytes Reveals Potential Therapeutic Targets for Liver Damage
Source: Cells. 2021 Aug 21;10(8):2159. doi: 10.3390/cells10082159 (PMC8392304; doi:10.3390/cells10082159)
Supplement: Supplementary file 1 [file cells-10-02159-s001.zip › Supplementary Table_1.xlsx]

## Sheet: Supplementary Table 1
Accession	Description	log2 fold change ko/WT	-log10 p-value KO/WT	p value	log2 norm. Abundance WT01	log2 norm. Abundance WT02	log2 norm. Abundance WT03	log2 norm. Abundance KO01	log2 norm. Abundance KO02	log2 norm. Abundance KO03	average WT	average NPC	ratio		Modifications	Student's T-test Significant KO_WTp 0.05	Student's T-test Significant KO_WTp 0.01	log2 fold change >1	log2 fold change <-1	log2 fold change >1_Student's T-test Significant KO_WTp 0.01	log2 fold change <-1_Student's T-test Significant KO_WTp 0.01	Coverage [%]	# Peptides	# Isoforms	# PSMs	# Unique Peptides	# Razor Peptides	# Protein Unique Peptides	# AAs	MW [kDa]	calc. pI	Sum PEP Score	Score Mascot: Mascot	Exp. q-value: Combined	Protein Group IDs
P20060	Beta-hexosaminidase subunit beta OS=Mus musculus OX=10090 GN=Hexb PE=1 SV=2	1.56865	4.30084	5.00218e-05	8.50303	8.51531	8.44874	10.1624	10.115	9.89558	8.48902	10.0577	1.56865			+	+	+		+_+		7	2	2	3	2	0	0	278	31.3	8.79	5.53	31	0	2014
P49935	Pro-cathepsin H OS=Mus musculus OX=10090 GN=Ctsh PE=1 SV=2	1.88547	4.16778	6.79546e-05	7.37243	7.56072	7.61618	9.37547	9.55459	9.27566	7.51644	9.40191	1.88547			+	+	+		+_+		10	1	1	2	1	0	1	131	14.3	4.96	5.609	62	0	4275
P48036	Annexin A5 OS=Mus musculus OX=10090 GN=Anxa5 PE=1 SV=1	1.02241	4.08686	8.18737e-05	11.4384	11.4768	11.3762	12.5117	12.5044	12.3425	11.4305	12.4529	1.02241			+	+	+		+_+		21	2	3	7	2	0	1	94	10.5	4.5	11.642	129	0	3442
E9PXI0	Proto-oncogene vav OS=Mus musculus OX=10090 GN=Vav1 PE=1 SV=1	1.52442	3.98401	0.000103751	6.43796	6.43962	6.39746	7.92837	8.12877	7.79116	6.42501	7.94943	1.52442			+		+				12	6	6	17	6	0	3	501	55	6.37	44.056	199	0	524
Q99K70	Ras-related GTP-binding protein C OS=Mus musculus OX=10090 GN=Rragc PE=1 SV=1	1.37038	3.53839	0.000289472	7.55919	7.65821	7.79766	9.22665	8.96203	8.93752	7.67169	9.04207	1.37038			+	+	+		+_+		13	3	3	7	3	0	0	341	38.6	7.15	25.992	231	0	4379
Q9WUU7	Cathepsin Z OS=Mus musculus OX=10090 GN=Ctsz PE=1 SV=1	1.97171	3.52463	0.000298792	9.30902	9.48804	9.77939	11.4138	11.6896	11.3882	9.52548	11.4972	1.97171			+	+	+		+_+		4	1	1	1	1	0	1	202	22.7	8.9	3.647	30	0.002	3233
Q9QWR8	Alpha-N-acetylgalactosaminidase OS=Mus musculus OX=10090 GN=Naga PE=1 SV=2	1.32909	3.49257	0.000321687	8.00282	7.91049	8.0607	9.49366	9.34119	9.12645	7.99133	9.32043	1.32909		Acetyl [N-Term]	+		+				46	8	11	27	8	0	7	132	14.6	8.4	52.532	441	0	2658
Q8K1X4	Nck-associated protein 1-like OS=Mus musculus OX=10090 GN=Nckap1l PE=1 SV=1	1.34494	3.48673	0.000326036	6.16591	6.37851	6.29829	7.48301	7.81634	7.57818	6.28091	7.62585	1.34494			+		+				10	3	3	5	3	0	1	335	37.5	6.21	6.501	40	0	563
Q9Z0M5	Lysosomal acid lipase/cholesteryl ester hydrolase OS=Mus musculus OX=10090 GN=Lipa PE=1 SV=2	1.55542	3.48672	0.000326046	6.67807	6.79442	6.86542	8.14975	8.56948	8.28494	6.7793	8.33472	1.55542			+		+				30	9	10	22	9	0	9	350	40.5	5.25	68.2	443	0	1347
Q9JJX6	P2X purinoceptor 4 OS=Mus musculus OX=10090 GN=P2rx4 PE=1 SV=1	1.73947	3.4403	0.000362824	9.46312	9.18413	9.30195	11.1644	11.2114	10.7918	9.3164	11.0559	1.73947			+		+				6	3	3	4	3	0	3	568	62.4	7.93	13.696	43	0	3263
Q9CY73	39S ribosomal protein L44, mitochondrial OS=Mus musculus OX=10090 GN=Mrpl44 PE=1 SV=3	-0.548364	3.41596	0.00038374	5.48543	5.59096	5.43962	4.93546	5	4.93546	5.50534	4.95697	-0.548364					+				12	6	6	16	6	0	1	493	54.4	6.62	35.167	143	0	3882
O09111	NADH dehydrogenase [ubiquinone] 1 beta subcomplex subunit 11, mitochondrial OS=Mus musculus OX=10090 GN=Ndufb11 PE=1 SV=2	-0.45653	3.39546	0.000402287	8.64818	8.67066	8.54303	8.14771	8.15178	8.19279	8.62062	8.16409	-0.45653			+		+				32	18	18	45	18	0	4	473	54.9	9.01	63.839	575	0	2992
Q8R143	Pituitary tumor-transforming gene 1 protein-interacting protein OS=Mus musculus OX=10090 GN=Pttg1ip PE=1 SV=1	1.46692	3.32686	0.000471133	8.28725	8.16591	8.27006	9.91901	9.74819	9.45677	8.24107	9.70799	1.46692		Acetyl [N-Term]	+	+	+		+_+		61	21	27	88	21	0	9	346	38.7	7.37	183.751	2166	0	2570
O08692	Neutrophilic granule protein OS=Mus musculus OX=10090 GN=Ngp PE=1 SV=1	0.879842	3.30469	0.000495806	6.52982	6.38888	6.47086	7.49025	7.29186	7.24698	6.46319	7.34303	0.879842			+	+	+		+_+		38	24	24	38	24	0	0	770	84.8	7.05	122.057	598	0	500
D3Z512	Deoxyribonuclease II alpha OS=Mus musculus OX=10090 GN=Dnase2a PE=1 SV=1	0.9274	3.19533	0.000637776	6.94603	6.97039	7.15178	7.84925	8.08587	7.91528	7.02273	7.95013	0.9274			+		+				23	1	1	5	1	0	1	71	7.8	7.99	7.413	119	0	1882
P37040	NADPH--cytochrome P450 reductase OS=Mus musculus OX=10090 GN=Por PE=1 SV=2	0.519387	3.15426	0.000701029	11.6487	11.5126	11.5702	12.1651	12.092	12.0326	11.5772	12.0966	0.519387			+	+	+		+_+		23	11	22	73	11	0	11	406	43.8	8.4	110.551	1562	0	3216
Q9DB34	Charged multivesicular body protein 2a OS=Mus musculus OX=10090 GN=Chmp2a PE=1 SV=1	0.15237	3.1533	0.000702587	7.36107	7.33896	7.31741	7.47168	7.50462	7.49825	7.33915	7.49152	0.15237			+		+				36	6	6	26	6	0	3	148	16.7	8.81	44.91	512	0	2754
Q9ET22	Dipeptidyl peptidase 2 OS=Mus musculus OX=10090 GN=Dpp7 PE=1 SV=2	1.77471	3.12481	0.000750222	7.62644	7.38111	8.02459	9.49905	9.47978	9.37743	7.67738	9.45209	1.77471			+	+	+		+_+		26	10	15	49	10	0	10	306	34	6.6	81.076	873	0	2802
P07309	Transthyretin OS=Mus musculus OX=10090 GN=Ttr PE=1 SV=1	1.46074	3.10443	0.000786264	8.47005	8.87774	8.60511	9.98442	10.0308	10.3199	8.65097	10.1117	1.46074		Acetyl [N-Term]	+	+	+		+_+		15	3	3	3	3	0	1	229	27.5	8.68	7.931	23	0	4869
Q8VCI0	Phospholipase B-like 1 OS=Mus musculus OX=10090 GN=Plbd1 PE=1 SV=1	0.976546	3.05043	0.000890369	8.11322	8.07788	8.22738	9.31673	9.0129	9.01848	8.13949	9.11604	0.976546			+	+	+		+_+		27	14	17	35	9	1	9	507	58.7	8.78	64.082	499	0	4347
P11247	Myeloperoxidase OS=Mus musculus OX=10090 GN=Mpo PE=1 SV=2	1.33979	3.03184	0.000929301	6.54071	6.24793	6.2891	7.49745	7.91946	7.68018	6.35924	7.69903	1.33979			+		+				8	2	4	24	2	0	1	238	25.7	6.98	24.898	476	0	4579
Q8C3J5	Dedicator of cytokinesis protein 2 OS=Mus musculus OX=10090 GN=Dock2 PE=1 SV=3	1.30185	3.00015	0.000999658	6.732	6.62059	6.69349	8.21043	8.03452	7.70667	6.68202	7.98387	1.30185			+	+	+		+_+		15	7	7	14	7	0	0	495	54.3	7.66	23.495	93	0	5141
Q9WVJ3	Carboxypeptidase Q OS=Mus musculus OX=10090 GN=Cpq PE=1 SV=1	1.77948	2.99286	0.00101659	7.96809	8.40897	8.44045	10.3335	9.91871	9.90373	8.2725	10.052	1.77948			+	+	+		+_+		3	2	2	6	2	0	2	531	57.8	6.67	4.093	33	0.002	4266
Q8BTX9	Inactive hydroxysteroid dehydrogenase-like protein 1 OS=Mus musculus OX=10090 GN=Hsdl1 PE=1 SV=1	0.32254	2.97413	0.00106137	7.25361	7.19869	7.28725	7.62425	7.54921	7.53372	7.24652	7.56906	0.32254			+	+	+		+_+		16	5	5	11	5	0	0	329	37.3	7.97	24.757	107	0	1301
O09159	Lysosomal alpha-mannosidase OS=Mus musculus OX=10090 GN=Man2b1 PE=1 SV=4	1.5735	2.95679	0.00110461	8.65535	8.7492	9.00871	10.6833	10.2708	10.1797	8.80442	10.3779	1.5735			+		+				11	3	3	3	3	0	3	265	29.9	7.83	7.742	66	0	912
A2AQN4	Acetyl-coenzyme A synthetase, cytoplasmic OS=Mus musculus OX=10090 GN=Acss2 PE=1 SV=1	-0.420787	2.95573	0.00110732	7.83605	7.95768	7.81057	7.41954	7.43296	7.48945	7.8681	7.44732	-0.420787			+	+	+		+_+		41	13	16	37	13	0	7	333	37.1	8.4	112.255	637	0	4097
Q8C5W3	Tubulin-specific chaperone cofactor E-like protein OS=Mus musculus OX=10090 GN=Tbcel PE=1 SV=1	-0.415255	2.94853	0.00112582	4.53605	4.61471	4.50462	4.16993	4.06178	4.17792	4.55179	4.13654	-0.415255			+	+	+		+_+		16	6	6	9	6	0	4	468	52.3	7.55	26.079	151	0	2794
Q8K1M3	Protein kinase, cAMP dependent regulatory, type II alpha OS=Mus musculus OX=10090 GN=Prkar2a PE=1 SV=1	0.108599	2.92916	0.00117717	8.1814	8.1809	8.1467	8.29094	8.27006	8.2738	8.16967	8.27827	0.108599			+	+	+		+_+		57	38	59	212	31	12	25	410	44.9	7.15	410.234	3405	0	4613
P10605	Cathepsin B OS=Mus musculus OX=10090 GN=Ctsb PE=1 SV=2	1.39824	2.92857	0.00117878	10.5979	10.5994	10.7058	11.7791	12.3443	11.9744	10.6343	12.0326	1.39824			+	+	+		+_+		41	24	28	76	24	0	8	557	61.4	5.19	137.391	1006	0	4422
Q8VEB4	Phospholipase A2 group XV OS=Mus musculus OX=10090 GN=Pla2g15 PE=1 SV=1	0.483303	2.82777	0.00148673	6.23074	6.28725	6.37851	6.86295	6.7761	6.70736	6.29883	6.78214	0.483303			+		+				3	2	2	2	2	0	2	554	61.5	7.68	4.706	47	0	4933
Q8BGS7	Choline/ethanolaminephosphotransferase 1 OS=Mus musculus OX=10090 GN=Cept1 PE=1 SV=1	0.494248	2.82416	0.00149913	5.7761	5.80735	5.88996	6.21335	6.3505	6.39232	5.82447	6.31872	0.494248			+		+				5	1	1	3	1	0	0	183	19.7	5.1	4.391	67	0	3366
Q8BXV2	BRI3-binding protein OS=Mus musculus OX=10090 GN=Bri3bp PE=1 SV=1	-0.441235	2.81876	0.00151788	6.63081	6.55766	6.49665	6.20359	6.08958	6.06824	6.56171	6.12047	-0.441235		Acetyl [N-Term]	+	+	+		+_+		15	3	3	9	3	0	0	234	25.6	4.65	14.238	152	0	2929
Q9WV54	Acid ceramidase OS=Mus musculus OX=10090 GN=Asah1 PE=1 SV=1	0.919924	2.81848	0.00151885	9.10093	9.16541	9.15127	10.2363	10.1046	9.83652	9.1392	10.0591	0.919924			+	+	+		+_+		13	5	5	7	5	0	5	350	39.1	5.54	19.346	54	0	2976
Q9ER41	Torsin-1B OS=Mus musculus OX=10090 GN=Tor1b PE=1 SV=2	0.46661	2.79528	0.00160221	6.51254	6.53138	6.61765	7.12205	6.98982	6.94953	6.55386	7.02047	0.46661			+		+				15	5	5	14	5	0	5	419	45.5	7.5	40.804	261	0	4025
Q62351	Transferrin receptor protein 1 OS=Mus musculus OX=10090 GN=Tfrc PE=1 SV=1	1.04337	2.7873	0.00163191	9.55286	9.26068	9.25786	10.2315	10.5676	10.4025	9.35713	10.4005	1.04337			+	+	+		+_+		14	19	20	46	19	0	3	1293	144.7	5.94	95.53	803	0	3885
Q8VEH3	ADP-ribosylation factor-like protein 8A OS=Mus musculus OX=10090 GN=Arl8a PE=1 SV=1	1.39398	2.77495	0.00167901	6.2854	6.69766	6.36457	7.67243	8.11166	7.74551	6.44921	7.8432	1.39398			+	+	+		+_+		24	6	7	16	6	0	3	220	24.4	6.42	30.85	226	0	4888
Q9JK92	Heat shock protein beta-8 OS=Mus musculus OX=10090 GN=Hspb8 PE=1 SV=1	-0.837354	2.76703	0.00170988	5.42626	5.72792	5.42626	4.62644	4.65535	4.7866	5.52682	4.68946	-0.837354			+	+	+		+_+		24	10	11	29	10	0	4	470	51.8	6.21	59.686	456	0	4001
Q9JHF5	V-type proton ATPase subunit a OS=Mus musculus OX=10090 GN=Tcirg1 PE=1 SV=1	1.63114	2.74382	0.00180375	10.1738	9.67172	9.84533	11.8541	11.4114	11.3189	9.89695	11.5281	1.63114			+	+	+		+_+		19	9	11	29	9	0	9	506	56.2	5.39	55.125	511	0	4675
P48025	Tyrosine-protein kinase SYK OS=Mus musculus OX=10090 GN=Syk PE=1 SV=2	0.884258	2.72178	0.00189767	7.29646	7.26772	7.24317	7.93899	8.16491	8.35623	7.26912	8.15338	0.884258					+				40	4	4	4	4	0	3	93	10.5	5.14	14.156	80	0	2966
Q8C6U2	Solute carrier family 66 member 3 OS=Mus musculus OX=10090 GN=Slc66a3 PE=1 SV=1	2.36099	2.71654	0.0019207	2.848	3.51096	3.74416	5.51728	6.09592	5.57289	3.36771	5.7287	2.36099			+		+				7	3	3	3	3	0	0	519	57.5	6.92	9.457	34	0	5484
Q8K297	Procollagen galactosyltransferase 1 OS=Mus musculus OX=10090 GN=Colgalt1 PE=1 SV=2	0.583411	2.71366	0.00193348	7.86666	8.01903	8.10014	8.57932	8.65213	8.50462	7.99528	8.57869	0.583411			+	+	+		+_+		6	2	2	2	2	0	2	446	50.4	7.49	8.877	45	0	4904
Q80VX2	CD200 antigen OS=Mus musculus OX=10090 GN=Cd200 PE=1 SV=1	2.89049	2.71119	0.00194449	3.12102	3.43296	2.926	6.56682	6.2555	5.32912	3.15999	6.05048	2.89049					+				17	8	8	16	8	0	4	440	49.2	7.12	33.833	198	0	905
P51908	C->U-editing enzyme APOBEC-1 OS=Mus musculus OX=10090 GN=Apobec1 PE=1 SV=1	1.95693	2.70303	0.00198141	4.20945	3.43296	4.03562	6.12309	5.70874	5.71699	3.89268	5.84961	1.95693			+		+				28	12	13	24	12	0	5	520	56	8.53	74.418	419	0	3957
Q9CQC8	Maspardin OS=Mus musculus OX=10090 GN=Spg21 PE=1 SV=1	0.835322	2.69628	0.00201241	6.3505	6.64674	6.55612	7.31741	7.50064	7.24127	6.51779	7.35311	0.835322			+		+				14	4	4	8	4	0	0	350	39.9	8.34	22.51	112	0	2457
P10107	Annexin A1 OS=Mus musculus OX=10090 GN=Anxa1 PE=1 SV=2	2.16514	2.6812	0.00208355	9.34829	9.1046	9.20604	10.9186	11.9363	11.2994	9.21964	11.3848	2.16514			+	+	+		+_+		7	6	7	16	6	0	6	523	58.1	7.06	35.429	280	0	2652
Q9CQW2	ADP-ribosylation factor-like protein 8B OS=Mus musculus OX=10090 GN=Arl8b PE=1 SV=1	1.52143	2.67994	0.00208958	8.20897	8.43921	8.29921	9.63408	10.245	9.63263	8.31579	9.83722	1.52143			+	+	+		+_+		23	7	7	16	7	0	7	327	36.8	8.9	33.813	303	0	5157
Q80VQ0	Aldehyde dehydrogenase family 3 member B1 OS=Mus musculus OX=10090 GN=Aldh3b1 PE=1 SV=1	1.86482	2.67651	0.00210616	5.78921	5.76022	6.30925	8.03342	7.98925	7.43045	5.95289	7.81771	1.86482			+		+				4	1	1	1	1	0	0	222	23.9	6.48	3.331	0	0.002	1210
P12265	Beta-glucuronidase OS=Mus musculus OX=10090 GN=Gusb PE=1 SV=2	1.43609	2.66291	0.00217317	9.19451	9.44108	9.69244	10.6242	11.129	10.8831	9.44268	10.8788	1.43609			+	+	+		+_+		28	12	14	50	3	10	3	388	43.4	7.99	73.962	671	0	4356
Q61247	Alpha-2-antiplasmin OS=Mus musculus OX=10090 GN=Serpinf2 PE=1 SV=1	1.16493	2.65027	0.00223732	6.06393	6.11061	5.81506	7.32193	6.88264	7.27984	5.99654	7.16147	1.16493					+				20	14	19	39	9	0	5	670	73.9	7.59	80.572	549	0	5231
Q05117	Tartrate-resistant acid phosphatase type 5 OS=Mus musculus OX=10090 GN=Acp5 PE=1 SV=2	1.74736	2.62385	0.00237764	6.45121	6.62059	6.64241	8.76354	8.28586	7.90689	6.5714	8.31877	1.74736					+				10	5	5	17	1	0	1	567	62.2	5.22	37.207	411	0	3027
Q9CQ62	2,4-dienoyl-CoA reductase, mitochondrial OS=Mus musculus OX=10090 GN=Decr1 PE=1 SV=1	-0.652385	2.60706	0.00247141	11.0697	10.9049	11.1786	10.4895	10.3023	10.4042	11.0511	10.3987	-0.652385			+		+				22	15	19	42	15	0	15	708	78.4	6.09	84.634	533	0	2282
Q61542	StAR-related lipid transfer protein 3 OS=Mus musculus OX=10090 GN=Stard3 PE=1 SV=1	1.76196	2.59145	0.00256184	4.20945	4.27798	4.37851	6.56072	5.73064	5.86047	4.28865	6.05061	1.76196			+		+				10	1	1	2	1	0	1	143	16.2	4.93	2.552	0	0.005	4477
P08752	Guanine nucleotide-binding protein G(i) subunit alpha-2 OS=Mus musculus OX=10090 GN=Gnai2 PE=1 SV=5	1.09779	2.58316	0.00261122	8.7445	8.79734	8.88783	9.86155	10.2031	9.65839	8.80989	9.90768	1.09779			+	+	+		+_+		18	9	9	18	6	0	0	509	58.3	8.75	43.397	249	0	3612
G3UX33	Sorting nexin-14 OS=Mus musculus OX=10090 GN=Snx14 PE=1 SV=1	0.541625	2.57893	0.00263676	3.848	3.99095	4.07039	4.45943	4.60881	4.46597	3.96978	4.5114	0.541625			+		+				4	3	3	4	3	0	3	931	102.1	5.07	9.724	38	0	3591
Q4LDD4	Arf-GAP with Rho-GAP domain, ANK repeat and PH domain-containing protein 1 OS=Mus musculus OX=10090 GN=Arap1 PE=1 SV=2	0.208959	2.5632	0.00273404	5.55766	5.55459	5.56072	5.8125	5.78136	5.70598	5.55765	5.76661	0.208959			+		+				19	2	5	20	2	0	2	155	15.8	9.13	30.143	297	0	458
G3X8X6	Sialoadhesin OS=Mus musculus OX=10090 GN=Siglec1 PE=1 SV=1	0.691198	2.54717	0.00283682	5.54226	5.69488	5.69488	6.42291	6.43296	6.14975	5.64401	6.3352	0.691198			+		+				4	2	2	2	2	0	1	447	50.2	8.09	8.168	65	0	2328
Q9QXW9	Large neutral amino acids transporter small subunit 2 OS=Mus musculus OX=10090 GN=Slc7a8 PE=1 SV=1	1.91302	2.54231	0.00286874	6.44626	6.29278	6.15785	8.6388	8.31696	7.68018	6.29896	8.21198	1.91302					+				73	13	37	150	13	0	13	135	15.1	6.54	266.832	2807	0	2202
P06800	Receptor-type tyrosine-protein phosphatase C OS=Mus musculus OX=10090 GN=Ptprc PE=1 SV=4	1.78342	2.53274	0.00293267	8.34518	8.43671	8.28771	10.4311	10.3924	9.59638	8.35654	10.14	1.78342		Acetyl [N-Term]			+				46	11	15	49	11	0	0	349	38.7	6.95	112.09	907	0	3757
O88668	Protein CREG1 OS=Mus musculus OX=10090 GN=Creg1 PE=1 SV=1	1.7807	2.53175	0.00293933	7.12619	7.55842	8.05365	9.39596	9.44646	9.23793	7.57942	9.36012	1.7807			+	+	+		+_+		16	9	10	18	9	0	3	458	50.1	6.54	47.738	172	0	5002
O08992	Syntenin-1 OS=Mus musculus OX=10090 GN=Sdcbp PE=1 SV=1	1.34482	2.52101	0.00301296	6.21723	6.42459	6.41954	7.94953	7.83794	7.30834	6.35379	7.69861	1.34482					+				50	19	27	144	8	1	0	130	14.1	11.05	161.475	2501	0	98
Q9CYN9	Renin receptor OS=Mus musculus OX=10090 GN=Atp6ap2 PE=1 SV=2	1.81816	2.51709	0.00304024	5.54844	4.73335	5.15785	7.28077	6.81762	6.79571	5.14655	6.9647	1.81816			+	+	+		+_+		31	20	20	83	20	0	9	834	93.4	6.38	135.244	1446	0	3361
Q7TMB8	Cytoplasmic FMR1-interacting protein 1 OS=Mus musculus OX=10090 GN=Cyfip1 PE=1 SV=1	0.605867	2.51586	0.00304888	9.01402	9.08667	9.04385	9.56129	9.83842	9.56243	9.04818	9.65405	0.605867					+				32	18	21	52	18	0	16	534	60.5	8.37	114.764	796	0	2139
Q08857	Platelet glycoprotein 4 OS=Mus musculus OX=10090 GN=Cd36 PE=1 SV=2	1.30485	2.5146	0.00305776	8.14211	8.27891	8.23218	9.33092	9.92214	9.3147	8.21773	9.52258	1.30485					+				17	4	4	8	4	0	4	253	26.7	8.15	15.776	94	0	4368
Q542I8	Integrin beta OS=Mus musculus OX=10090 GN=Itgb2 PE=1 SV=1	2.0885	2.50332	0.00313818	8.1236	7.73064	7.83289	10.2042	10.3701	9.37829	7.89571	9.98421	2.0885			+	+	+		+_+		25	19	20	56	19	0	16	749	84.8	5.94	113.884	751	0	3161
P62748	Hippocalcin-like protein 1 OS=Mus musculus OX=10090 GN=Hpcal1 PE=1 SV=2	1.32679	2.47743	0.00333095	8.02625	8.09698	7.90929	8.94017	9.62297	9.44977	8.01084	9.33763	1.32679			+		+				22	10	10	19	9	0	2	461	51	6.48	39.391	267	0	3315
Q3TYS2	Cytochrome b-245 chaperone 1 OS=Mus musculus OX=10090 GN=Cybc1 PE=1 SV=2	0.817112	2.47715	0.00333307	6.38198	6.51728	6.46434	7.2891	7.47816	7.04767	6.45453	7.27164	0.817112			+	+	+		+_+		30	9	9	20	9	0	9	320	35.1	8.03	44.041	155	0	2808
O35728	Cytochrome P450 4A14 OS=Mus musculus OX=10090 GN=Cyp4a14 PE=1 SV=1	1.95022	2.47621	0.00334032	8.37808	8.17493	8.25503	10.8191	9.81041	10.0291	8.26934	10.2196	1.95022			+	+	+		+_+		38	21	33	130	21	0	21	406	43.1	6.37	236.74	2894	0	2876
Q8BTJ4	Bis(5'-adenosyl)-triphosphatase enpp4 OS=Mus musculus OX=10090 GN=Enpp4 PE=1 SV=1	0.644004	2.47501	0.00334956	7.19672	7.23649	7.16591	8.04111	7.70736	7.78267	7.19971	7.84371	0.644004			+	+	+		+_+		27	23	24	52	23	0	23	1013	114.6	8.13	112.519	611	0	5155
Q2TBE6	Phosphatidylinositol 4-kinase type 2-alpha OS=Mus musculus OX=10090 GN=Pi4k2a PE=1 SV=1	1.13858	2.46535	0.0034249	7.39917	6.82528	7.15684	8.37156	8.31016	8.1153	7.1271	8.26567	1.13858			+		+				12	3	4	11	3	0	2	275	31.2	6.68	16.358	196	0	4524
Q99P65	Equilibrative nucleoside transporter 3 OS=Mus musculus OX=10090 GN=Slc29a3 PE=1 SV=1	1.14911	2.46263	0.00344647	5.48543	5.29278	5.57592	6.46761	6.92955	6.40429	5.45138	6.60048	1.14911			+	+	+		+_+		33	19	19	46	19	0	19	536	61.1	8.12	86.345	626	0	2846
Q9CQC9	GTP-binding protein SAR1b OS=Mus musculus OX=10090 GN=Sar1b PE=1 SV=1	-0.348188	2.44793	0.00356507	8.66	8.51531	8.61728	8.32193	8.22593	8.20016	8.59753	8.24934	-0.348188			+	+	+		+_+		20	8	8	13	8	0	8	397	45.3	8.07	42.5	160	0	5064
Q8R1F1	Protein Niban 2 OS=Mus musculus OX=10090 GN=Niban2 PE=1 SV=2	1.58702	2.44471	0.00359163	8.79149	8.99209	8.86047	10.0519	10.923	10.4302	8.88135	10.4684	1.58702			+		+				39	18	25	104	18	0	12	264	27.5	8.38	157.296	1208	0	4883
P30204	Macrophage scavenger receptor types I and II OS=Mus musculus OX=10090 GN=Msr1 PE=1 SV=3	1.64268	2.4223	0.00378182	7.43796	7.59021	7.54535	9.55785	9.28979	8.65392	7.52451	9.16719	1.64268			+		+				24	3	3	4	3	0	1	140	15.5	9	9.436	64	0	3018
P70665	Sialate O-acetylesterase OS=Mus musculus OX=10090 GN=Siae PE=1 SV=3	0.967401	2.40666	0.00392046	5.04002	5.22497	5.39917	6.43129	6.1127	6.02237	5.22138	6.18879	0.967401			+		+				5	1	1	2	1	0	0	151	17.4	8.84	3.16	0	0.003	2085
A0A0R4J0K5	SLAM family member 5 OS=Mus musculus OX=10090 GN=Cd84 PE=1 SV=1	1.91139	2.40065	0.00397512	6.3733	6.13545	5.84298	8.22545	8.38716	7.4733	6.11724	8.02863	1.91139					+				4	1	1	1	1	0	1	204	22.7	7.09	3.507	29	0.002	4246
Q9D1K2	V-type proton ATPase subunit F OS=Mus musculus OX=10090 GN=Atp6v1f PE=1 SV=2	0.742079	2.38007	0.00416804	7.52121	7.48543	7.7761	8.17243	8.46761	8.36894	7.59425	8.33633	0.742079			+	+	+		+_+		24	13	15	43	13	0	11	544	61.1	8.24	66.946	690	0	2719
O35744	Chitinase-like protein 3 OS=Mus musculus OX=10090 GN=Chil3 PE=1 SV=2	1.29837	2.37971	0.00417144	5.33628	5.24793	5.06178	6.23074	6.91289	6.39746	5.21533	6.5137	1.29837			+	+	+		+_+		15	5	6	17	5	0	3	326	34.8	8.85	21.508	254	0	5051
F6WR04	Cathepsin S OS=Mus musculus OX=10090 GN=Ctss PE=1 SV=1	2.37098	2.37861	0.0041821	4.56682	5.0917	4.64386	6.6851	7.86851	6.86171	4.76746	7.13844	2.37098					+				21	10	12	29	10	0	10	435	49.3	6.39	67.434	333	0	5056
Q8R0X7	Sphingosine-1-phosphate lyase 1 OS=Mus musculus OX=10090 GN=Sgpl1 PE=1 SV=1	0.709807	2.36396	0.00432558	9.80365	9.59675	9.71802	10.4498	10.5804	10.2177	9.70614	10.4159	0.709807			+		+				13	5	7	10	5	0	2	528	56.7	7.15	30.242	220	0	3876
P06728	Apolipoprotein A-IV OS=Mus musculus OX=10090 GN=Apoa4 PE=1 SV=3	1.25631	2.36009	0.00436424	7.75556	7.0917	7.35138	8.66463	8.48341	8.81954	7.39955	8.65586	1.25631			+	+	+		+_+		8	7	7	9	7	0	0	821	95.5	6.58	20.488	46	0	2752
Q9ES97	Reticulon-3 OS=Mus musculus OX=10090 GN=Rtn3 PE=1 SV=2	0.883649	2.35937	0.00437146	7.46597	7.49025	7.58571	8.57061	8.51846	8.10381	7.51398	8.39763	0.883649			+	+	+		+_+		25	14	19	106	10	8	10	415	45.7	7.39	89.884	1690	0	4914
Q07797	Galectin-3-binding protein OS=Mus musculus OX=10090 GN=Lgals3bp PE=1 SV=1	0.889343	2.35723	0.00439304	7.6359	7.92125	7.75422	8.48824	8.91259	8.57856	7.77046	8.6598	0.889343			+	+	+		+_+		28	6	6	34	4	2	0	186	21.5	8.43	49.24	622	0	3131
A0A1D5RLX9	Putative sodium-coupled neutral amino acid transporter 7 (Fragment) OS=Mus musculus OX=10090 GN=Slc38a7 PE=1 SV=1	1.13788	2.35331	0.0044329	6.53761	6.63807	6.63807	8.12928	7.52826	7.56986	6.60458	7.74247	1.13788					+				17	5	5	9	5	0	0	327	35.9	5.81	26.766	106	0	444
Q3UMB9	WASH complex subunit 4 OS=Mus musculus OX=10090 GN=Washc4 PE=1 SV=2	0.372458	2.35135	0.00445297	5.32553	5.47897	5.53294	5.83542	5.83542	5.78398	5.44581	5.81827	0.372458			+		+				33	2	2	2	2	0	0	73	8.6	9.52	4.946	31	0	2834
Q9JHS3	Ragulator complex protein LAMTOR2 OS=Mus musculus OX=10090 GN=Lamtor2 PE=1 SV=1	1.07747	2.35093	0.00445731	6.11894	6.25361	6.2384	6.92837	7.53216	7.38284	6.20365	7.28112	1.07747			+	+	+		+_+		13	5	5	15	5	0	3	402	45.6	6.04	28.538	198	0	3186
P31996	Macrosialin OS=Mus musculus OX=10090 GN=Cd68 PE=1 SV=1	1.53571	2.34841	0.00448325	7.88081	8.1236	8.06124	9.1533	10.032	9.48744	8.02188	9.55759	1.53571			+		+				15	2	2	2	2	0	2	181	21.1	6.81	13.407	51	0	572
Q99LR1	Lysophosphatidylserine lipase ABHD12 OS=Mus musculus OX=10090 GN=Abhd12 PE=1 SV=2	0.936223	2.33615	0.00461158	8.28725	8.29692	8.17991	8.91229	9.46373	9.19672	8.25469	9.19091	0.936223					+				11	4	4	6	2	1	0	440	49	6.46	20.468	69	0	820
O88587	Catechol O-methyltransferase OS=Mus musculus OX=10090 GN=Comt PE=1 SV=2	-1.31779	2.33136	0.00466277	10.8314	10.0348	10.3825	9.09276	9.12309	9.07948	10.4162	9.09844	-1.31779					+				5	4	4	4	4	0	4	942	102.6	4.36	12.062	48	0	4352
O70404	Vesicle-associated membrane protein 8 OS=Mus musculus OX=10090 GN=Vamp8 PE=1 SV=1	0.841434	2.32866	0.00469182	8.41236	8.23793	8.36063	8.90809	9.36479	9.26233	8.33697	9.1784	0.841434					+				3	1	1	1	1	0	0	264	30.1	6.13	2.392	16	0.008	1165
Q9CXF0	Kynureninase OS=Mus musculus OX=10090 GN=Kynu PE=1 SV=3	-0.425946	2.32862	0.00469229	9.18562	9.30492	9.25597	8.84486	8.6987	8.92511	9.24884	8.82289	-0.425946			+	+	+		+_+		18	4	4	18	4	0	0	174	20	8.63	12.095	150	0	4962
Q6ZQM8	UDP-glucuronosyltransferase 1-7C OS=Mus musculus OX=10090 GN=Ugt1a7c PE=1 SV=1	1.04716	2.32301	0.0047532	3.79701	3.87774	3.58496	4.62644	5.12515	4.64962	3.75324	4.8004	1.04716			+	+	+		+_+		54	8	10	28	8	0	8	147	15.8	6.16	57.556	436	0	4200
P11438	Lysosome-associated membrane glycoprotein 1 OS=Mus musculus OX=10090 GN=Lamp1 PE=1 SV=2	2.06665	2.32208	0.00476347	10.0905	9.45635	9.57686	12.3887	11.5107	11.4243	9.70791	11.7746	2.06665					+				9	4	4	7	4	0	3	540	63.8	9.01	15.369	67	0	901
P26231	Catenin alpha-1 OS=Mus musculus OX=10090 GN=Ctnna1 PE=1 SV=1	-0.204343	2.31491	0.00484267	10.6193	10.531	10.6362	10.4146	10.3975	10.3614	10.5955	10.3911	-0.204343					+				39	17	21	88	3	0	3	463	50.4	9.03	108.461	1243	0	2991
O88325	Alpha-N-acetylglucosaminidase OS=Mus musculus OX=10090 GN=Naglu PE=1 SV=1	0.467264	2.30293	0.00497819	7.37243	7.1809	7.19869	7.82655	7.69209	7.63517	7.25067	7.71794	0.467264			+	+	+		+_+		38	26	30	73	26	0	17	648	74.1	6.7	137.277	839	0	5466
Q9D8T7	SRA stem-loop-interacting RNA-binding protein, mitochondrial OS=Mus musculus OX=10090 GN=Slirp PE=1 SV=2	0.443915	2.30062	0.00500478	5.04002	4.87283	4.80735	5.39917	5.37851	5.27426	4.90673	5.35065	0.443915					+				30	16	22	52	16	0	16	478	54	5.1	93.056	679	0	3658
P29416	Beta-hexosaminidase subunit alpha OS=Mus musculus OX=10090 GN=Hexa PE=1 SV=2	0.813402	2.29215	0.0051033	6.99322	7.21626	7.32463	8.11738	8.08215	7.77479	7.17804	7.99144	0.813402		Acetyl [N-Term]	+		+				59	3	3	6	3	0	1	91	9.6	4.87	19.869	185	0	4796
Q61704	Inter-alpha-trypsin inhibitor heavy chain H3 OS=Mus musculus OX=10090 GN=Itih3 PE=1 SV=3	0.710495	2.2921	0.00510388	4.46597	4.30012	4.1127	5.1334	4.8679	5.00899	4.29293	5.00343	0.710495					+				68	42	61	204	38	4	38	608	68.6	6.07	377.666	3477	0	4629
Q8VE96	Solute carrier family 35 member F6 OS=Mus musculus OX=10090 GN=Slc35f6 PE=1 SV=1	1.21989	2.29073	0.00512001	6.55305	7.27333	7.00562	8.23649	8.21626	8.03892	6.944	8.16389	1.21989					+				18	5	5	5	5	0	2	245	28.1	4.77	13.145	63	0	2629
Q80X95	Ras-related GTP-binding protein A OS=Mus musculus OX=10090 GN=Rraga PE=1 SV=1	0.842241	2.28022	0.00524547	7.97384	8.08108	7.91946	9.08348	8.58158	8.83605	7.99146	8.8337	0.842241			+	+	+		+_+		21	11	12	33	11	0	0	434	49.6	7.02	46.626	245	0	3906
Q62465	Synaptic vesicle membrane protein VAT-1 homolog OS=Mus musculus OX=10090 GN=Vat1 PE=1 SV=3	1.57745	2.27575	0.00529968	10.2169	10.1988	10.442	11.348	12.2898	11.9523	10.2859	11.8634	1.57745			+		+				30	7	8	24	4	0	4	207	23.6	9.07	35.382	399	0	3410
O89112	Glutathione S-transferase LANCL1 OS=Mus musculus OX=10090 GN=Lancl1 PE=1 SV=1	-0.158539	2.25522	0.00555622	5.35403	5.37851	5.38543	5.2555	5.22497	5.16189	5.37266	5.21412	-0.158539			+	+	+		+_+		45	16	21	59	16	0	16	347	38.7	6.29	114.241	733	0	2067
P11276	Fibronectin OS=Mus musculus OX=10090 GN=Fn1 PE=1 SV=4	0.386271	2.25413	0.00557017	9.53041	9.71613	9.65964	10.0519	10.0802	9.93295	9.63539	10.0217	0.386271			+		+				5	2	2	4	2	0	2	404	44.9	6.09	5.414	30	0	4758
Q9DB05	Alpha-soluble NSF attachment protein OS=Mus musculus OX=10090 GN=Napa PE=1 SV=1	0.348185	2.25153	0.0056037	8.51215	8.50819	8.5074	8.73505	8.95216	8.88509	8.50925	8.85743	0.348185			+		+				17	5	5	14	5	0	3	339	38.7	6.21	24.467	128	0	1369
Q80WQ2	Protein VAC14 homolog OS=Mus musculus OX=10090 GN=Vac14 PE=1 SV=1	0.534048	2.24086	0.00574298	6.57743	6.45943	6.63372	7.24698	7.07039	6.95536	6.55686	7.09091	0.534048			+	+	+		+_+		57	28	44	158	28	0	28	339	37.3	5.91	267.864	2607	0	404
O88833	Cytochrome P450 4A10 OS=Mus musculus OX=10090 GN=Cyp4a10 PE=2 SV=2	1.7132	2.23672	0.00579798	6.15583	6.40429	6.38716	8.6453	7.6907	7.75087	6.31576	8.02896	1.7132			+	+	+		+_+		18	4	4	10	2	0	0	186	21.4	7.77	20.29	195	0	3772
P62835	Ras-related protein Rap-1A OS=Mus musculus OX=10090 GN=Rap1a PE=1 SV=1	0.364843	2.22779	0.00591841	5.25172	5.05311	5.05311	5.51728	5.47249	5.46271	5.11931	5.48416	0.364843			+		+				47	13	14	38	4	0	0	192	21.4	7.61	67.398	715	0	3682
Q61646	Haptoglobin OS=Mus musculus OX=10090 GN=Hp PE=1 SV=1	1.40698	2.22597	0.00594337	9.09408	9.57837	9.48884	10.3848	10.87	11.1275	9.3871	10.7941	1.40698					+				56	9	10	26	9	0	6	142	15.9	5.4	37.162	459	0	4028
P97429	Annexin A4 OS=Mus musculus OX=10090 GN=Anxa4 PE=1 SV=4	0.972433	2.22189	0.00599947	11.4328	10.8538	11.0798	12.2077	12.1117	11.9643	11.1221	12.0945	0.972433			+	+	+		+_+		17	6	6	11	6	0	4	404	43.8	6.14	29.136	149	0	3613
P23780	Beta-galactosidase OS=Mus musculus OX=10090 GN=Glb1 PE=1 SV=1	0.996717	2.2166	0.0060729	6.86542	6.90328	7.2555	7.80349	8.27659	7.93428	7.00807	8.00479	0.996717					+				44	12	14	42	12	0	10	381	42.7	5.67	99.575	850	0	4458
Q62167	ATP-dependent RNA helicase DDX3X OS=Mus musculus OX=10090 GN=Ddx3x PE=1 SV=3	-0.460547	2.21355	0.00611572	9.96304	10.0729	9.79149	9.4292	9.5308	9.48583	9.94249	9.48194	-0.460547			+		+				19	9	9	15	9	0	6	535	60.9	8.47	36.238	194	0	3701
Q9R0E2	Procollagen-lysine,2-oxoglutarate 5-dioxygenase 1 OS=Mus musculus OX=10090 GN=Plod1 PE=1 SV=1	0.654425	2.21044	0.00615968	5.71425	5.64386	5.90207	6.32193	6.6014	6.30012	5.75339	6.40782	0.654425					+				22	17	19	46	16	0	16	842	93.7	8.05	110.33	893	0	3760
Q9CQ02	COMM domain-containing protein 4 OS=Mus musculus OX=10090 GN=Commd4 PE=1 SV=1	0.522769	2.20791	0.00619565	5.55766	5.82018	5.64097	6.18587	6.30743	6.09381	5.67293	6.1957	0.522769			+	+	+		+_+		22	9	11	21	9	0	2	398	44.1	5.1	48.331	261	0	2441
Q9DCJ9	N-acetylneuraminate lyase OS=Mus musculus OX=10090 GN=Npl PE=1 SV=1	1.57782	2.20673	0.00621257	7.47168	7.76089	7.38888	8.5672	9.33918	9.44853	7.54048	9.1183	1.57782			+		+				9	1	1	2	1	0	1	159	18	4.89	8.592	76	0	1427
Q61207	Prosaposin OS=Mus musculus OX=10090 GN=Psap PE=1 SV=2	1.83726	2.20084	0.00629737	9.44522	9.54284	9.50263	10.9943	12.0317	10.9765	9.4969	11.3342	1.83726			+		+				19	9	10	20	9	0	3	589	63.4	6.8	39.612	224	0	4273
P47754	F-actin-capping protein subunit alpha-2 OS=Mus musculus OX=10090 GN=Capza2 PE=1 SV=3	0.771328	2.19943	0.00631788	8.44128	8.82909	8.66213	9.39296	9.59003	9.2635	8.64417	9.4155	0.771328		Acetyl [N-Term]			+				36	5	5	11	5	0	1	132	14.9	5.63	21.461	153	0	4728
Q9CQW9	Interferon-induced transmembrane protein 3 OS=Mus musculus OX=10090 GN=Ifitm3 PE=1 SV=1	0.721852	2.19262	0.00641766	7.32283	7.21043	7.10957	7.73471	8.16138	7.91229	7.21428	7.93613	0.721852			+		+				18	5	5	11	1	0	0	288	32.7	7.01	16.673	73	0	2733
A1L314	Macrophage-expressed gene 1 protein OS=Mus musculus OX=10090 GN=Mpeg1 PE=1 SV=1	0.9068	2.18323	0.006558	7.55305	7.33092	7.38974	8.32193	8.61581	8.05637	7.42457	8.33137	0.9068			+	+	+		+_+		6	6	6	11	6	0	6	1134	128.8	6.64	24.303	168	0	3136
Q8BN82	Sialin OS=Mus musculus OX=10090 GN=Slc17a5 PE=1 SV=2	1.91896	2.17804	0.00663688	6.15583	5.73606	5.80478	8.49705	7.35138	7.60511	5.89889	7.81785	1.91896		Acetyl [N-Term]	+	+	+		+_+		23	6	6	9	6	0	2	299	32.4	7.15	15.574	90	0	4688
Q61124	Battenin OS=Mus musculus OX=10090 GN=Cln3 PE=1 SV=2	1.19203	2.16817	0.00678932	4.10434	4.40599	4.59694	5.92362	5.41278	5.34696	4.36909	5.56112	1.19203					+				38	8	8	29	3	5	2	1126	115.2	5.59	58.113	584	0	150
Q8BLF1	Neutral cholesterol ester hydrolase 1 OS=Mus musculus OX=10090 GN=Nceh1 PE=1 SV=1	1.29258	2.16441	0.00684845	8.3837	8.05853	8.18438	9.21018	9.96347	9.33069	8.20887	9.50145	1.29258			+	+	+		+_+		15	9	9	17	9	0	6	718	81.1	9.55	41.595	248	0	1471
Q9CPX7	28S ribosomal protein S16, mitochondrial OS=Mus musculus OX=10090 GN=Mrps16 PE=1 SV=1	-0.55441	2.16106	0.00690152	4.54844	4.36457	4.35755	3.70044	3.90689	4	4.42352	3.86911	-0.55441					+				9	2	2	5	2	0	1	223	25.3	9.6	5.719	0	0	5145
Q9JJF9	Signal peptide peptidase-like 2A OS=Mus musculus OX=10090 GN=Sppl2a PE=1 SV=2	1.75112	2.15909	0.00693289	7.32912	6.76686	7.19574	9.43108	8.4508	8.6632	7.09724	8.84836	1.75112			+	+	+		+_+		28	13	18	43	13	0	8	415	47.2	6.44	72.237	525	0	3680
O89013	Leptin receptor gene-related protein OS=Mus musculus OX=10090 GN=Leprot PE=1 SV=1	2.74395	2.14407	0.00717673	3.36457	NaN	2.88753	6.38543	5.853	5.37156	3.12605	5.87	2.74395			+	+	+		+_+		43	9	9	22	9	0	1	193	22.3	5.5	37.345	223	0	4154
P50516	V-type proton ATPase catalytic subunit A OS=Mus musculus OX=10090 GN=Atp6v1a PE=1 SV=2	1.26963	2.14138	0.00722141	9.81234	9.74298	9.88692	10.6007	11.4216	11.2288	9.81408	11.0837	1.26963			+		+				10	3	3	3	3	0	0	388	43.5	8.43	8.13	15	0	1571
Q8BX70	Vacuolar protein sorting-associated protein 13C OS=Mus musculus OX=10090 GN=Vps13c PE=1 SV=2	0.515594	2.13968	0.00724976	8.3015	8.01402	8.02292	8.58759	8.70667	8.59096	8.11281	8.62841	0.515594					+				8	2	2	2	2	0	0	278	31.9	7.27	6.265	39	0	175
Q01405	Protein transport protein Sec23A OS=Mus musculus OX=10090 GN=Sec23a PE=1 SV=2	-0.269195	2.13503	0.00732771	9.40365	9.27403	9.27146	8.99577	9.10276	9.04303	9.31638	9.04719	-0.269195			+		+				36	14	19	71	14	0	14	351	40.3	5	88.597	1099	0	3384
A0A338P7B7	Dynein light chain Tctex-type 1A OS=Mus musculus OX=10090 GN=Dynlt1a PE=1 SV=1	0.762231	2.122	0.0075509	3.82782	4.04439	3.89724	4.43296	4.91169	4.71149	3.92315	4.68538	0.762231					+				5	2	2	3	2	0	1	385	43.8	6.28	6.7	0	0	3625
Q8BJZ3	Protein lifeguard 3 OS=Mus musculus OX=10090 GN=Tmbim1 PE=1 SV=1	0.987817	2.11232	0.00772119	4.29278	4.38543	4.43296	5.74147	5.10434	5.22882	4.37039	5.35821	0.987817			+	+	+		+_+		16	8	9	23	8	0	7	472	52.7	8.35	54.02	489	0	214
Q8R3R8	Gamma-aminobutyric acid receptor-associated protein-like 1 OS=Mus musculus OX=10090 GN=Gabarapl1 PE=1 SV=2	0.588911	2.11175	0.00773134	6.01792	6.03342	5.89724	6.78921	6.42626	6.49985	5.98286	6.57177	0.588911			+	+	+		+_+		4	8	8	18	8	0	2	1828	211.6	6.99	31.021	174	0	4051
Q3UDC3	Target of Myb protein 1 OS=Mus musculus OX=10090 GN=Tom1 PE=1 SV=1	0.666128	2.1109	0.00774633	5.38198	5.05311	5.27426	5.71699	6.01346	5.97728	5.23645	5.90258	0.666128					+				19	9	9	15	9	0	9	474	53.1	7.87	45.016	180	0	4989
Q8BGF9	Solute carrier family 25 member 44 OS=Mus musculus OX=10090 GN=Slc25a44 PE=1 SV=1	-0.679617	2.10037	0.00793643	5.2211	5.18982	4.79701	4.37156	4.36457	4.43296	5.06931	4.3897	-0.679617					+				62	17	35	159	17	0	17	103	11.4	11.36	167.31	3236	0	3632
Q8BK72	28S ribosomal protein S27, mitochondrial OS=Mus musculus OX=10090 GN=Mrps27 PE=1 SV=2	-0.296188	2.09068	0.00811565	7.50541	7.36282	7.30469	7.08002	7.11582	7.08852	7.39098	7.09479	-0.296188			+	+	+		+_+		4	3	3	3	3	0	3	756	85.9	6.99	4.968	14	0	4693
P11928	2'-5'-oligoadenylate synthase 1A OS=Mus musculus OX=10090 GN=Oas1a PE=1 SV=2	1.11873	2.08734	0.00817825	8.08481	8.63408	8.39532	9.76802	9.50641	9.19599	8.3714	9.49014	1.11873			+	+	+		+_+		10	5	5	13	4	1	0	398	44.4	5.69	17.142	171	0	5079
Q9WTR1	Transient receptor potential cation channel subfamily V member 2 OS=Mus musculus OX=10090 GN=Trpv2 PE=1 SV=2	1.29839	2.08455	0.00823097	5.16993	4.82782	4.99095	6.56072	6.52356	5.79961	4.99623	6.29463	1.29839		Acetyl [N-Term]	+		+				11	4	4	5	4	0	0	462	51.7	5.45	7.846	19	0	881
O35604	NPC intracellular cholesterol transporter 1 OS=Mus musculus OX=10090 GN=Npc1 PE=1 SV=2	-1.93449	2.08347	0.00825143	9.28656	8.55612	8.78921	7.61102	6.62644	6.59096	8.8773	6.94281	-1.93449					+				18	3	3	7	3	0	0	322	35.7	9.88	44.59	290	0	3968
Q8BFR4	N-acetylglucosamine-6-sulfatase OS=Mus musculus OX=10090 GN=Gns PE=1 SV=1	1.5386	2.08233	0.00827322	8.1634	8.79636	9.19918	10.2092	10.4444	10.1211	8.71965	10.2582	1.5386			+	+	+		+_+		25	10	13	35	10	0	7	408	45.7	7.05	62.437	472	0	2774
E9PVA8	eIF-2-alpha kinase activator GCN1 OS=Mus musculus OX=10090 GN=Gcn1 PE=1 SV=1	-0.403794	2.08175	0.00828427	9.85144	9.72485	9.57988	9.36479	9.2703	9.3097	9.71872	9.31493	-0.403794			+		+				13	6	7	11	5	2	3	448	50	4.59	16.088	85	0	1724
Q9JHJ3	Glycosylated lysosomal membrane protein OS=Mus musculus OX=10090 GN=Glmp PE=1 SV=1	1.38576	2.07989	0.00831972	5.16189	5.52669	5.22497	7.20848	6.35931	6.50303	5.30452	6.69027	1.38576			+	+	+		+_+		41	23	33	105	23	0	11	617	68.3	5.58	173.729	1452	0	1659
Q9CWZ7	Gamma-soluble NSF attachment protein OS=Mus musculus OX=10090 GN=Napg PE=1 SV=1	0.47352	2.07636	0.0083876	7.98242	7.87221	8.00619	8.33405	8.60437	8.34296	7.95361	8.42713	0.47352			+	+	+		+_+		30	10	10	18	10	0	10	395	45	5.47	47.955	205	0	4731
O55100	Synaptogyrin-1 OS=Mus musculus OX=10090 GN=Syngr1 PE=1 SV=2	1.8233	2.07334	0.00844622	4.19377	4.34341	4.47249	5.64097	6.87283	5.96578	4.33656	6.15986	1.8233					+				9	4	4	8	4	0	2	617	65.6	6.57	15.566	84	0	1341
O35405	5'-3' exonuclease PLD3 OS=Mus musculus OX=10090 GN=Pld3 PE=1 SV=1	1.22719	2.07183	0.00847555	5.848	6.50779	6.40939	7.32553	7.78136	7.33985	6.25506	7.48225	1.22719			+		+				8	4	5	12	4	0	4	453	50.5	6.28	23.807	168	0	3474
Q8BUR4	Dedicator of cytokinesis protein 1 OS=Mus musculus OX=10090 GN=Dock1 PE=1 SV=3	-0.195357	2.07091	0.00849365	4.37851	4.32193	4.24031	4.12928	4.1127	4.1127	4.31358	4.11823	-0.195357					+				1	2	2	2	2	0	0	1906	215.6	5.8	3.837	0	0.002	349
Q99KB8	Hydroxyacylglutathione hydrolase, mitochondrial OS=Mus musculus OX=10090 GN=Hagh PE=1 SV=2	-0.608432	2.05265	0.00885823	9.45039	9.77297	9.66213	9.02348	8.87006	9.16667	9.6285	9.02007	-0.608432					+				3	3	3	7	3	0	1	1153	133.3	7.53	12.097	49	0	1117
Q8BVE3	V-type proton ATPase subunit H OS=Mus musculus OX=10090 GN=Atp6v1h PE=1 SV=1	0.99179	2.05185	0.00887464	7.39489	7.40429	7.41532	7.98812	8.66959	8.53216	7.40483	8.39662	0.99179					+				44	14	14	74	1	0	0	317	35.7	8.62	93.685	1145	0	5228
Q9QZ03	Zinc transporter ZIP1 OS=Mus musculus OX=10090 GN=Slc39a1 PE=2 SV=3	1.07287	2.04887	0.00893575	3.71149	4.04439	3.63227	4.9542	4.51096	5.1416	3.79605	4.86892	1.07287					+				48	11	15	52	3	11	0	136	15.4	11.12	66.067	499	0	3873
P17047	Lysosome-associated membrane glycoprotein 2 OS=Mus musculus OX=10090 GN=Lamp2 PE=1 SV=2	1.52339	2.04036	0.00911245	10.2687	9.75556	9.80155	12.0156	11.2505	11.1298	9.94192	11.4653	1.52339			+	+	+		+_+		10	5	5	10	5	0	5	488	54.4	6.52	21.341	98	0	2667
Q2NL51	Glycogen synthase kinase-3 alpha OS=Mus musculus OX=10090 GN=Gsk3a PE=1 SV=2	0.372449	2.03902	0.00914079	5.11686	4.97269	5.22497	5.51728	5.49506	5.41954	5.10484	5.47729	0.372449					+				11	3	3	5	3	0	0	332	36.2	5.55	15.295	65	0	2325
A0A5F8MPS7	Lysosomal acid phosphatase OS=Mus musculus OX=10090 GN=Acp2 PE=1 SV=1	1.41414	2.03882	0.00914484	8.30241	7.74483	7.97499	9.90554	9.30058	9.05853	8.00741	9.42155	1.41414			+	+	+		+_+		14	8	8	9	8	0	6	570	65.3	7.72	25.231	90	0	2949
Q9QYY9	All-trans-retinol dehydrogenase [NAD(+)] ADH4 OS=Mus musculus OX=10090 GN=Adh4 PE=1 SV=4	-0.74962	2.03866	0.00914821	8.13288	8.12516	8.26772	7.5744	7.12205	7.58045	8.17525	7.42563	-0.74962			+	+	+		+_+		9	3	3	9	3	0	1	372	41	7.14	23.476	217	0	5313
P56565	Protein S100-A1 OS=Mus musculus OX=10090 GN=S100a1 PE=1 SV=2	2.65901	2.0368	0.00918755	6.35403	7.22497	6.61029	8.43129	10.1227	9.61232	6.72976	9.38877	2.65901					+				39	21	22	41	21	0	7	515	59.2	6.49	85.814	490	0	3087
O70252	Heme oxygenase 2 OS=Mus musculus OX=10090 GN=Hmox2 PE=1 SV=1	0.972304	2.03673	0.00918906	8.75922	9.09276	9.11192	9.69714	10.282	9.90162	8.98797	9.96027	0.972304		Acetyl [N-Term]	+		+				39	8	9	19	8	0	2	209	23.7	7.39	42.769	252	0	2449
Q9DCF9	Translocon-associated protein subunit gamma OS=Mus musculus OX=10090 GN=Ssr3 PE=1 SV=1	-0.598599	2.03081	0.00931522	8.53255	8.39489	8.25125	7.6886	7.7039	7.99039	8.3929	7.7943	-0.598599					+				55	17	36	180	1	24	0	126	13.9	10.32	189.359	3401	0	210
P29452	Caspase-1 OS=Mus musculus OX=10090 GN=Casp1 PE=1 SV=1	1.50007	2.02303	0.00948345	5.25927	5.61765	5.81506	6.53294	7.46352	7.19574	5.564	7.06407	1.50007			+		+				6	3	3	4	3	0	0	619	69.3	6.06	10.097	40	0	2500
P18242	Cathepsin D OS=Mus musculus OX=10090 GN=Ctsd PE=1 SV=1	1.84392	2.01906	0.00957069	10.2626	10.5887	10.9349	11.8204	13.0111	12.4865	10.5954	12.4393	1.84392			+		+				29	24	24	45	23	1	3	922	100	5.94	130.825	937	0	2023
Q99MZ7	Peroxisomal trans-2-enoyl-CoA reductase OS=Mus musculus OX=10090 GN=Pecr PE=1 SV=1	-0.583856	2.00548	0.00987468	10.671	10.6329	10.7202	10.1471	9.85393	10.2716	10.6747	10.0909	-0.583856		Acetyl [N-Term]			+				41	2	2	2	2	0	1	44	5.1	5.06	5.557	32	0	1372
Q61093	Cytochrome b-245 heavy chain OS=Mus musculus OX=10090 GN=Cybb PE=1 SV=1	1.22088	2.00526	0.00987965	7.18587	6.89239	6.96347	8.48261	8.48502	7.73674	7.01391	8.23479	1.22088			+	+	+		+_+		6	2	2	3	2	0	0	438	47.6	5.44	7.36	0	0	49
P51658	Estradiol 17-beta-dehydrogenase 2 OS=Mus musculus OX=10090 GN=Hsd17b2 PE=1 SV=2	-1.23992	2.00081	0.00998139	11.1939	10.571	10.4092	9.70096	9.27356	9.47978	10.7247	9.48477	-1.23992			+		+				54	23	23	63	23	0	14	382	43.9	7.46	114.907	622	0	5136
A2AJL3	FGGY carbohydrate kinase domain-containing protein OS=Mus musculus OX=10090 GN=Fggy PE=1 SV=1	-0.56613	2.00039	0.00999108	4.83794	4.95884	4.57894	4.12928	4.24793	4.30012	4.79191	4.22578	-0.56613		Acetyl [N-Term]	+		+				36	4	5	19	4	0	4	118	13.7	7.97	36.894	684	0	2951
P29752	Alpha-lactalbumin OS=Mus musculus OX=10090 GN=Lalba PE=1 SV=1	1.72988	1.9969	0.0100716	4.65535	4.09592	3.96347	5.57289	6.58195	5.74953	4.23825	5.96813	1.72988			+		+				13	6	6	14	6	0	3	463	51	5.92	19.148	109	0	1612
Q80SY3	V-type proton ATPase subunit d 2 OS=Mus musculus OX=10090 GN=Atp6v0d2 PE=2 SV=2	2.28041	1.99273	0.0101688	5.70598	4.23266	5.40259	7.19081	7.82273	7.16892	5.11374	7.39416	2.28041			+		+				33	58	60	113	56	2	1	2048	233.2	6.16	271.599	1235	0	4967
Q61144	Presenilin-2 OS=Mus musculus OX=10090 GN=Psen2 PE=1 SV=3	1.27405	1.99256	0.0101729	6.00675	5.79961	5.79442	7.67878	6.85175	6.89239	5.86692	7.14097	1.27405			+		+				12	7	7	13	7	0	2	594	66.2	6.13	26.056	129	0	4986
Q9QY06	Unconventional myosin-IXb OS=Mus musculus OX=10090 GN=Myo9b PE=1 SV=2	0.43023	1.98959	0.0102426	6.75221	6.72656	6.89966	7.1179	7.3733	7.17792	6.79281	7.22304	0.43023			+		+				12	5	5	8	5	0	4	525	59.4	6.61	17.647	50	0	2527
Q9R1Q9	V-type proton ATPase subunit S1 OS=Mus musculus OX=10090 GN=Atp6ap1 PE=1 SV=1	1.18449	1.9857	0.0103347	6.58045	6.42459	6.77215	8.24935	7.60881	7.47249	6.59239	7.77688	1.18449					+				26	5	5	10	5	0	5	86	9.6	7.97	15.975	169	0	3967
Q64281	Leukocyte immunoglobulin-like receptor subfamily B member 4 OS=Mus musculus OX=10090 GN=Lilrb4 PE=1 SV=1	2.30022	1.97997	0.0104721	4.24793	3.62059	3.74416	6.94369	6.24413	5.32553	3.87089	6.17111	2.30022			+	+	+		+_+		4	2	2	5	2	0	0	491	54.9	6.3	13.77	94	0	583
Q9CZE3	Ras-related protein Rab-32 OS=Mus musculus OX=10090 GN=Rab32 PE=1 SV=3	0.717916	1.97662	0.0105531	8.24127	7.86666	8.07842	8.98954	8.75922	8.59134	8.06212	8.78003	0.717916					+				5	2	2	5	2	0	0	347	39.4	5.24	7.197	61	0	4365
Q61838	Pregnancy zone protein OS=Mus musculus OX=10090 GN=Pzp PE=1 SV=3	0.642207	1.97324	0.0106357	10.3385	10.4968	10.1355	11.0323	10.7764	11.0887	10.3236	10.9658	0.642207			+	+	+		+_+		10	3	3	4	3	0	2	475	51.7	7.61	8.187	30	0	373
Q91VM9	Inorganic pyrophosphatase 2, mitochondrial OS=Mus musculus OX=10090 GN=Ppa2 PE=1 SV=1	-0.374734	1.96644	0.0108033	8.90569	8.63081	8.71562	8.35799	8.35799	8.41193	8.75071	8.37597	-0.374734			+		+				2	2	2	4	2	0	0	1048	116.7	6.05	5.026	18	0	4244
Q9JHK5	Pleckstrin OS=Mus musculus OX=10090 GN=Plek PE=1 SV=1	1.75146	1.95874	0.0109967	6.55766	6.84423	6.7866	9.20701	8.31877	7.91707	6.7295	8.48095	1.75146					+				4	1	1	2	1	0	0	356	40.1	7.62	9.456	54	0	4131
P48962	ADP/ATP translocase 1 OS=Mus musculus OX=10090 GN=Slc25a4 PE=1 SV=4	0.821178	1.95535	0.0110828	8.61985	8.83857	8.50064	9.26819	9.77742	9.37699	8.65302	9.4742	0.821178			+		+				11	2	2	2	2	0	2	147	16.9	8.76	5.204	31	0	2693
P01897	H-2 class I histocompatibility antigen, L-D alpha chain OS=Mus musculus OX=10090 GN=H2-L PE=1 SV=2	0.548058	1.95392	0.0111193	9.26374	9.36698	9.37873	10.0732	9.91064	9.66977	9.33648	9.88454	0.548058		Acetyl [N-Term]			+				43	3	4	4	3	0	1	96	11	7.25	13.094	20	0	5319
Q8C1Y8	Vacuolar fusion protein CCZ1 homolog OS=Mus musculus OX=10090 GN=Ccz1 PE=1 SV=1	1.06147	1.94954	0.011232	6.12309	5.41954	5.40939	6.75355	6.73471	6.64818	5.65067	6.71215	1.06147			+		+				6	3	3	3	3	0	0	537	61	7.53	15.574	89	0	4250
P63213	Guanine nucleotide-binding protein G(I)/G(S)/G(O) subunit gamma-2 OS=Mus musculus OX=10090 GN=Gng2 PE=1 SV=2	2.08272	1.94726	0.0112913	3.53605	NaN	2.848	5.64097	5.26679	4.91648	3.19202	5.27474	2.08272			+	+	+		+_+		36	15	15	25	15	0	3	479	54.2	8.05	64.142	239	0	5241
O08915	AH receptor-interacting protein OS=Mus musculus OX=10090 GN=Aip PE=1 SV=1	0.655649	1.94369	0.0113845	4.30743	4.32193	4.1127	NaN	5.00899	4.79701	4.24735	4.903	0.655649			+	+	+		+_+		14	5	5	10	5	0	0	409	44.1	5.53	24.529	88	0	1494
O70200	Allograft inflammatory factor 1 OS=Mus musculus OX=10090 GN=Aif1 PE=1 SV=1	1.14569	1.94306	0.011401	4.30743	4.79701	4.17792	5.54535	5.2817	5.89239	4.42745	5.57315	1.14569					+				55	38	56	139	31	10	28	627	70.1	5.33	296.458	2291	0	2418
Q05144	Ras-related C3 botulinum toxin substrate 2 OS=Mus musculus OX=10090 GN=Rac2 PE=1 SV=1	1.39385	1.94303	0.0114018	6.32193	6.05961	5.68089	7.06501	7.90749	7.27146	6.02081	7.41466	1.39385					+				18	6	6	6	4	0	0	349	39.4	6.8	18.189	90	0	155
O88531	Palmitoyl-protein thioesterase 1 OS=Mus musculus OX=10090 GN=Ppt1 PE=1 SV=2	0.852603	1.94288	0.0114056	7.63807	7.54689	7.89905	8.85331	8.48018	8.30834	7.69467	8.54728	0.852603			+		+				47	21	25	77	21	0	17	511	56.5	5.81	154.883	1255	0	1521
P05366	Serum amyloid A-1 protein OS=Mus musculus OX=10090 GN=Saa1 PE=1 SV=2	-0.701237	1.94257	0.0114138	6.25172	5.75221	5.96578	5.41616	5.23649	5.21335	5.98991	5.28867	-0.701237			+		+				7	2	2	6	2	0	2	342	37.4	6.61	13.401	177	0	507
E9PZ88	Alpha-mannosidase 2C1 OS=Mus musculus OX=10090 GN=Man2c1 PE=1 SV=1	0.28731	1.93716	0.0115568	5.88753	5.8505	6.04658	6.16792	6.22689	6.25172	5.9282	6.21551	0.28731			+	+	+		+_+		29	10	11	30	10	0	3	367	42.4	8.09	55.554	473	0	2444
Q9CZN7	Serine hydroxymethyltransferase, mitochondrial OS=Mus musculus OX=10090 GN=Shmt2 PE=1 SV=1	-0.391424	1.92422	0.0119063	10.9528	11.0253	11.179	10.5449	10.7423	10.6958	11.0524	10.661	-0.391424					+				54	29	34	131	2	0	2	531	57.9	7.14	228.434	1802	0	5118
Q8BUU7	N-acetylgalactosamine kinase OS=Mus musculus OX=10090 GN=Galk2 PE=1 SV=1	0.837779	1.92386	0.0119164	3.65535	3.54844	3.6893	4.09592	4.67243	4.63807	3.63103	4.46881	0.837779			+		+				4	2	2	4	2	0	0	534	59.7	7.14	8.896	36	0	943
O08600	Endonuclease G, mitochondrial OS=Mus musculus OX=10090 GN=Endog PE=1 SV=1	-0.514069	1.9226	0.011951	8.24365	8.10329	8.13443	7.57743	7.50064	7.86109	8.16045	7.64639	-0.514069					+				44	14	14	83	0	2	0	317	35.8	8.81	100.126	1296	0	1176
Q9JL62	Glycolipid transfer protein OS=Mus musculus OX=10090 GN=Gltp PE=1 SV=3	1.21764	1.92239	0.0119566	7.55152	8.29692	7.96924	8.84204	9.45162	9.17692	7.93922	9.15686	1.21764					+				38	10	12	28	10	0	7	295	33.5	7.02	67.162	498	0	2897
P50518	V-type proton ATPase subunit E 1 OS=Mus musculus OX=10090 GN=Atp6v1e1 PE=1 SV=2	1.08888	1.91855	0.0120627	8.79636	8.91019	8.96751	9.507	10.3244	10.1093	8.89136	9.98024	1.08888			+	+	+		+_+		40	16	19	53	12	4	7	355	40.5	5.45	108.764	1033	0	5098
A0A338P7E3	Ribonuclease T2-B OS=Mus musculus OX=10090 GN=Rnaset2b PE=1 SV=1	0.657314	1.91046	0.0122896	6.22689	6.63372	6.6014	7.16792	7.26491	7.00113	6.48734	7.14465	0.657314			+		+				13	2	2	2	2	0	2	148	15.9	10.17	5.383	27	0	1514
Q69ZN7	Myoferlin OS=Mus musculus OX=10090 GN=Myof PE=1 SV=2	1.18044	1.90367	0.0124834	10.3826	10.426	10.26	11.6087	11.9622	11.039	10.3562	11.5366	1.18044		Acetyl [N-Term]	+		+				41	12	20	45	12	0	3	226	26.1	8.43	92.028	979	0	2868
Q8BJS4	SUN domain-containing protein 2 OS=Mus musculus OX=10090 GN=Sun2 PE=1 SV=3	0.66689	1.90046	0.012576	5.92362	6.22497	6.27426	6.92837	6.90569	6.58946	6.14095	6.80784	0.66689					+				1	1	1	1	1	0	0	1263	141.7	5.29	3.894	33	0.002	2602
P97369	Neutrophil cytosol factor 4 OS=Mus musculus OX=10090 GN=Ncf4 PE=1 SV=2	1.4037	1.89851	0.0126326	6.22689	6.03342	5.95652	6.88509	7.96694	7.57592	6.07228	7.47598	1.4037					+				6	1	1	1	1	0	1	181	20.7	8.56	4.37	50	0	3921
Q8VDP3	[F-actin]-monooxygenase MICAL1 OS=Mus musculus OX=10090 GN=Mical1 PE=1 SV=1	1.14721	1.89588	0.0127093	4.91169	5.27053	4.57894	5.7761	6.38888	6.03782	4.92039	6.0676	1.14721			+		+				14	7	7	14	7	0	7	603	68.4	7.25	30.178	160	0	4517
Q6A0D4	Raftlin OS=Mus musculus OX=10090 GN=Rftn1 PE=1 SV=4	1.83702	1.89556	0.0127187	2.74416	3.21723	3.23266	5.54535	4.98185	4.17792	3.06468	4.90171	1.83702					+				11	3	4	6	1	0	1	323	37.3	6.01	13.747	58	0	3971
P08905	Lysozyme C-2 OS=Mus musculus OX=10090 GN=Lyz2 PE=1 SV=2	1.97917	1.89521	0.0127289	7.25361	7.34163	7.10014	8.60437	10.1034	8.92511	7.23179	9.21097	1.97917			+	+	+		+_+		22	2	2	6	2	0	1	125	13.5	5.4	11.582	128	0	4737
Q3U7R1	Extended synaptotagmin-1 OS=Mus musculus OX=10090 GN=Esyt1 PE=1 SV=2	0.496754	1.8925	0.0128085	7.50541	7.56758	7.56072	7.89845	8.26725	7.95826	7.54457	8.04132	0.496754			+		+				5	4	4	6	4	0	3	905	103.6	7.93	21.281	56	0	5311
P26151	High affinity immunoglobulin gamma Fc receptor I OS=Mus musculus OX=10090 GN=Fcgr1 PE=1 SV=1	1.40606	1.88821	0.0129356	5.83036	5.66107	5.44626	7.58421	7.0607	6.51096	5.64589	7.05196	1.40606			+	+	+		+_+		4	1	1	5	1	0	1	324	34.3	5.69	4.71	66	0	5434
Q9D125	28S ribosomal protein S25, mitochondrial OS=Mus musculus OX=10090 GN=Mrps25 PE=1 SV=1	-0.38045	1.88618	0.0129963	7.02126	6.75489	6.82146	6.45286	6.43962	6.56377	6.86587	6.48542	-0.38045					+				4	2	2	3	2	0	0	337	37.7	6.07	3.576	17	0.002	4556
Q9CYZ6	Required for excision 1-B domain-containing protein OS=Mus musculus OX=10090 GN=Rex1bd PE=1 SV=1	-0.67061	1.88556	0.0130148	6.69627	6.17792	6.46923	5.79961	5.6865	5.84549	6.44781	5.7772	-0.67061			+		+				18	5	5	12	5	0	3	344	36.9	5.06	27.773	149	0	1884
Q8CGA3	Large neutral amino acids transporter small subunit 4 OS=Mus musculus OX=10090 GN=Slc43a2 PE=1 SV=1	2.23415	1.8764	0.0132924	NaN	3.07039	2.926	5.74147	5.32912	4.62644	2.99819	5.23234	2.23415			+		+				9	4	4	7	4	0	4	480	55.5	6.02	15.115	42	0	4041
Q8BYA0	Tubulin-specific chaperone D OS=Mus musculus OX=10090 GN=Tbcd PE=1 SV=1	0.590693	1.87504	0.0133341	4.99548	5.06609	5.12515	5.50462	5.92125	5.53294	5.06224	5.65294	0.590693					+				6	5	5	6	2	0	0	929	103.3	5.31	13.716	73	0	145
P17809	Solute carrier family 2, facilitated glucose transporter member 1 OS=Mus musculus OX=10090 GN=Slc2a1 PE=1 SV=4	-0.83506	1.86865	0.0135317	6.80349	7.20163	7.16491	5.92362	6.42291	6.31832	7.05668	6.22162	-0.83506					+				54	22	35	96	22	0	15	311	35.8	5.68	173.242	1497	0	3429
Q9QZI8	Serine incorporator 1 OS=Mus musculus OX=10090 GN=Serinc1 PE=1 SV=1	1.25204	1.86521	0.0136392	7.67313	7.19574	7.34873	9.18264	8.39789	8.39318	7.40587	8.6579	1.25204					+				20	9	9	23	9	0	9	445	50.4	8.48	41.741	126	0	2932
P01878	Ig alpha chain C region OS=Mus musculus OX=10090 PE=1 SV=1	1.06585	1.8648	0.0136521	7.03012	7.19279	7.04767	8.61434	7.76155	8.09223	7.09019	8.15604	1.06585					+				10	1	1	2	1	0	0	78	9.1	5.21	2.569	14	0.005	461
Q91XD4	Formimidoyltransferase-cyclodeaminase OS=Mus musculus OX=10090 GN=Ftcd PE=1 SV=1	-0.535397	1.86332	0.0136988	10.8731	11.2525	11.0732	10.503	10.4345	10.6551	11.0663	10.5309	-0.535397					+				8	5	5	14	4	0	0	700	76.7	7.25	21.628	100	0	1182
F7CUP3	N-acetylglucosamine-6-phosphate deacetylase OS=Mus musculus OX=10090 GN=Amdhd2 PE=1 SV=2	0.811932	1.86219	0.0137343	5.57289	5.88753	5.88996	6.2891	6.84172	6.65535	5.78346	6.59539	0.811932			+	+	+		+_+		29	23	39	116	2	0	2	531	59.7	8.35	175.636	1288	0	4832
Q7TMY4	THO complex subunit 7 homolog OS=Mus musculus OX=10090 GN=Thoc7 PE=1 SV=2	-0.511216	1.85708	0.0138969	6.06393	5.6865	5.90207	5.35403	5.2891	5.47573	5.88417	5.37295	-0.511216			+	+	+		+_+		31	23	28	70	23	0	9	763	85.7	6.57	148.326	992	0	2619
P60766	Cell division control protein 42 homolog OS=Mus musculus OX=10090 GN=Cdc42 PE=1 SV=2	0.467626	1.84674	0.0142318	9.74937	9.83999	9.73623	10.0917	10.4515	10.1852	9.7752	10.2428	0.467626					+				47	18	26	65	18	0	8	300	34.3	7.36	113.216	756	0	244
P53810	Phosphatidylinositol transfer protein alpha isoform OS=Mus musculus OX=10090 GN=Pitpna PE=1 SV=2	0.747443	1.84049	0.0144383	9.03672	9.6101	9.21941	9.97484	10.1639	9.96982	9.28875	10.0362	0.747443					+				8	3	3	5	3	0	0	464	50.7	5.29	19.353	121	0	141
Q80X71	Transmembrane protein 106B OS=Mus musculus OX=10090 GN=Tmem106b PE=1 SV=1	1.57327	1.83353	0.0146715	8.33271	7.66249	7.90268	10.1904	9.14185	9.2854	7.96596	9.53923	1.57327					+				3	1	1	1	1	0	0	228	26.1	4.98	3.121	17	0.003	2410
A0A0J9YUC8	Arachidonate 5-lipoxygenase-activating protein OS=Mus musculus OX=10090 GN=Alox5ap PE=1 SV=1	1.50543	1.83047	0.0147751	4.10434	4.21723	4.08746	5.30378	6.36982	5.25172	4.13634	5.64177	1.50543					+				5	2	2	6	1	0	0	379	42.9	6.05	7.133	0	0	1592
P28867	Protein kinase C delta type OS=Mus musculus OX=10090 GN=Prkcd PE=1 SV=3	0.840268	1.82737	0.0148809	7.42291	7.69558	7.47897	8.02625	8.66995	8.42206	7.53248	8.37275	0.840268					+				6	4	4	11	1	0	1	553	61.8	5.4	12.319	197	0	5308
Q9Z0U1	Tight junction protein ZO-2 OS=Mus musculus OX=10090 GN=Tjp2 PE=1 SV=2	-0.388795	1.82579	0.0149351	7.78986	8.06178	8.02126	7.48623	7.58946	7.63081	7.95763	7.56884	-0.388795			+		+				44	7	8	22	6	0	4	191	21.3	8.12	46.031	433	0	3402
A0A0R4J138	Arylsulfatase B OS=Mus musculus OX=10090 GN=Arsb PE=1 SV=1	1.10815	1.82544	0.0149472	5.43296	4.50462	4.91648	6.07468	6.11061	5.99322	4.95135	6.0595	1.10815			+		+				12	14	15	40	3	0	0	1276	140.6	8.85	64.637	699	0	4490
P52431	DNA polymerase delta catalytic subunit OS=Mus musculus OX=10090 GN=Pold1 PE=1 SV=2	0.54525	1.81853	0.015187	3.926	4.36457	4.19377	4.62644	4.75489	4.73877	4.16145	4.7067	0.54525			+	+	+		+_+		69	31	45	146	30	0	12	319	35.7	4.96	201.125	2142	0	661
P02104	Hemoglobin subunit epsilon-Y2 OS=Mus musculus OX=10090 GN=Hbb-y PE=1 SV=2	0.940769	1.81218	0.0154107	4.95884	4.16993	4.59694	5.58797	5.52042	5.43962	4.57523	5.516	0.940769			+		+				19	10	10	17	10	0	3	665	75.6	7.05	43.044	252	0	985
Q9Z1G3	V-type proton ATPase subunit C 1 OS=Mus musculus OX=10090 GN=Atp6v1c1 PE=1 SV=4	1.18832	1.80714	0.0155906	9.61287	9.48382	9.64476	10.2267	11.218	10.8618	9.58048	10.7688	1.18832					+				43	4	4	9	4	0	1	77	8.5	8.57	10.091	17	0	1177
Q9D8B6	Protein FAM210B, mitochondrial OS=Mus musculus OX=10090 GN=Fam210b PE=1 SV=3	-0.451371	1.7997	0.01586	7.82464	7.53294	7.83479	7.38543	7.22497	7.22786	7.73079	7.27942	-0.451371					+				23	4	4	7	4	0	4	226	22.1	4.51	30.222	208	0	5005
P97797	Tyrosine-protein phosphatase non-receptor type substrate 1 OS=Mus musculus OX=10090 GN=Sirpa PE=1 SV=2	0.765782	1.79892	0.0158885	5.2211	5.76022	5.67525	6.15987	6.47573	6.31832	5.55219	6.31797	0.765782			+		+				48	18	21	51	14	4	8	298	32.9	8.66	69.009	757	0	1360
Q8BGA2	LHFPL tetraspan subfamily member 2 protein OS=Mus musculus OX=10090 GN=Lhfpl2 PE=1 SV=1	1.74451	1.79583	0.0160018	4.41954	4.21723	3.62059	6.12309	6.25927	5.10852	4.08579	5.83029	1.74451					+				28	16	17	25	16	0	2	595	67.5	7.81	77.004	278	0	414
P63082	V-type proton ATPase 16 kDa proteolipid subunit OS=Mus musculus OX=10090 GN=Atp6v0c PE=1 SV=1	1.68813	1.79192	0.0161464	8.96347	7.69349	8.4417	10.4363	9.73013	9.99661	8.36622	10.0543	1.68813					+				8	3	3	4	3	0	3	226	25.2	7.23	8.188	21	0	4902
Q8K124	Pleckstrin homology domain-containing family O member 2 OS=Mus musculus OX=10090 GN=Plekho2 PE=1 SV=1	0.657534	1.7906	0.0161957	6.57743	6.1416	6.59842	7.00562	7.23458	7.04985	6.43915	7.09668	0.657534					+				23	4	4	4	4	0	1	266	28.6	7.94	16.182	41	0	3112
P84096	Rho-related GTP-binding protein RhoG OS=Mus musculus OX=10090 GN=Rhog PE=1 SV=1	1.02683	1.7899	0.0162217	6.38198	6.83668	6.83162	7.36982	8.08852	7.67243	6.68343	7.71025	1.02683			+		+				15	9	14	65	9	0	5	574	63.6	7.61	116.18	1243	0	1149
Q8CJG0	Protein argonaute-2 OS=Mus musculus OX=10090 GN=Ago2 PE=1 SV=3	-0.279369	1.78699	0.0163309	4.37851	4.16993	4.27798	4.01792	3.926	4.04439	4.27547	3.99611	-0.279369					+				9	5	5	10	5	0	1	470	53.5	8.84	15.705	147	0	3759
Q9R1Q6	Transmembrane protein 176B OS=Mus musculus OX=10090 GN=Tmem176b PE=1 SV=1	0.758682	1.7868	0.0163379	6.88142	6.55459	7.19771	7.57743	7.71836	7.61397	6.87791	7.63659	0.758682			+	+					17	10	10	25	10	0	7	647	73.1	7.47	49.025	250	0	5178
Q9WTM5	RuvB-like 2 OS=Mus musculus OX=10090 GN=Ruvbl2 PE=1 SV=3	0.160805	1.78628	0.0163576	7.38802	7.41363	7.47249	7.53605	7.64458	7.57592	7.42471	7.58552	0.160805			+						2	3	3	4	3	0	0	1853	215.4	8.63	8.587	39	0	2332
Q61549	Adhesion G protein-coupled receptor E1 OS=Mus musculus OX=10090 GN=Adgre1 PE=1 SV=1	1.69649	1.78118	0.0165508	4.08746	4.76553	4.45943	6.58045	6.44294	5.37851	4.43748	6.13397	1.69649									8	10	10	31	1	0	0	1253	145.6	7.05	42.731	213	0	3312
A0A0N4SVU8	Transmembrane protein 176A (Fragment) OS=Mus musculus OX=10090 GN=Tmem176a PE=1 SV=1	0.832241	1.78104	0.0165562	3.89724	3.62059	4.20163	4.93546	4.7761	4.50462	3.90649	4.73873	0.832241			+						4	4	4	7	4	0	0	783	86.4	6.9	9.478	35	0	2841
A0A1D5RLV0	Protein IWS1 homolog OS=Mus musculus OX=10090 GN=Iws1 PE=1 SV=1	-0.482241	1.78033	0.0165833	6.00225	5.71973	5.86047	5.33628	5.55152	5.24793	5.86082	5.37858	-0.482241			+	+					28	11	12	26	11	0	1	483	55.8	6.61	67.394	226	0	903
Q8BGR9	Ubiquitin-like domain-containing CTD phosphatase 1 OS=Mus musculus OX=10090 GN=Ublcp1 PE=1 SV=1	-0.552941	1.77658	0.0167271	5.09592	5.18982	5.34341	4.45943	4.87283	4.63807	5.20972	4.65678	-0.552941									35	7	10	24	4	4	1	178	20.5	8.59	30.504	110	0	828
A0A1B0GX27	Branched-chain-amino-acid aminotransferase OS=Mus musculus OX=10090 GN=Bcat2 PE=1 SV=1	1.3253	1.76749	0.0170808	4.20945	4.88753	5.04002	5.8802	6.47249	5.76022	4.71233	6.03763	1.3253			+						3	3	3	3	3	0	0	879	100.8	7.08	11.478	47	0	5252
Q8BHL5	Engulfment and cell motility protein 2 OS=Mus musculus OX=10090 GN=Elmo2 PE=1 SV=1	0.825536	1.76615	0.0171338	5.20163	4.63227	5.17792	5.71699	6.02459	5.74685	5.00394	5.82948	0.825536			+	+					8	4	4	5	4	0	3	309	34.4	6.84	10.619	72	0	4873
Q8K2I3	Dimethylaniline monooxygenase [N-oxide-forming] 2 OS=Mus musculus OX=10090 GN=Fmo2 PE=1 SV=3	1.37779	1.7659	0.0171437	6.72792	7.06286	7.24222	8.94281	7.84549	8.37808	7.011	8.38879	1.37779									4	2	2	2	2	0	0	543	61.7	8.15	5.74	24	0	1553
Q8C878	NEDD8-activating enzyme E1 catalytic subunit OS=Mus musculus OX=10090 GN=Uba3 PE=1 SV=2	1.29681	1.75558	0.0175559	5.79701	6.54535	6.45286	7.2384	8.01848	7.42878	6.26507	7.56189	1.29681									46	22	30	91	22	0	16	448	51.6	5.67	223.134	2404	0	1193
Q9DC50	Peroxisomal carnitine O-octanoyltransferase OS=Mus musculus OX=10090 GN=Crot PE=1 SV=1	-0.372639	1.7532	0.0176523	8.84424	9.16466	9.02791	8.59283	8.66356	8.66249	9.01227	8.63963	-0.372639			+	+					28	14	15	31	14	0	4	550	63	8.87	64.382	331	0	3637
Q91VA0	Acyl-coenzyme A synthetase ACSM1, mitochondrial OS=Mus musculus OX=10090 GN=Acsm1 PE=1 SV=1	-0.724462	1.75233	0.0176877	10.6048	10.5469	10.8162	10.2608	9.71562	9.8181	10.656	9.93151	-0.724462			+	+					71	27	37	96	26	0	10	319	35.9	5.57	198.723	1494	0	4290
P70704	Phospholipid-transporting ATPase IA OS=Mus musculus OX=10090 GN=Atp8a1 PE=1 SV=2	0.932391	1.7499	0.017787	5.65535	4.87283	5.30743	6.31288	6.26679	6.05311	5.27854	6.21093	0.932391		Acetyl [N-Term]	+	+					43	14	14	28	14	0	4	315	35.7	5.87	64.564	349	0	2859
O09043	Napsin-A OS=Mus musculus OX=10090 GN=Napsa PE=1 SV=1	1.81586	1.74963	0.0177979	5.87529	5.17792	5.2817	8.08905	6.85549	6.83794	5.44497	7.26083	1.81586									25	8	9	34	8	0	7	262	28.8	6.15	47.086	439	0	2889
Q3TCN2	Putative phospholipase B-like 2 OS=Mus musculus OX=10090 GN=Plbd2 PE=1 SV=2	1.1771	1.7486	0.0178403	7.16088	7.40599	7.507	9.09882	8.33092	8.17542	7.35796	8.53505	1.1771			+	+					5	3	3	5	3	0	1	541	60.7	6.79	8.125	99	0	2483
O35887	Calumenin OS=Mus musculus OX=10090 GN=Calu PE=1 SV=1	0.78302	1.74063	0.0181708	6.13955	6.24222	6.3345	6.66676	7.33896	7.05961	6.23876	7.02178	0.78302			+						69	16	22	93	16	0	12	207	23.5	6.7	129.341	1823	0	3208
P54116	Erythrocyte band 7 integral membrane protein OS=Mus musculus OX=10090 GN=Stom PE=1 SV=3	0.641015	1.73705	0.018321	8.25219	7.74079	8.18834	8.6837	8.78333	8.63735	8.06044	8.70146	0.641015									28	3	5	12	3	0	2	236	25.8	5.83	50.873	297	0	2901
Q8CIV8	Tubulin-specific chaperone E OS=Mus musculus OX=10090 GN=Tbce PE=1 SV=1	0.430114	1.72988	0.0186258	4.08746	4.40599	4.22497	4.7761	4.55459	4.67807	4.23947	4.66959	0.430114									2	2	2	6	1	0	1	804	89.4	6.92	8.027	67	0	2104
Q9R0T8	Inhibitor of nuclear factor kappa-B kinase subunit epsilon OS=Mus musculus OX=10090 GN=Ikbke PE=1 SV=2	0.289523	1.72641	0.0187756	4.74416	4.93074	4.89239	5.24031	5.07039	5.12515	4.85576	5.14529	0.289523			+						21	3	3	3	3	0	0	151	16.7	4.89	11.491	47	0	3642
Q03311	Cholinesterase OS=Mus musculus OX=10090 GN=Bche PE=1 SV=2	1.08232	1.72613	0.0187873	6.91767	7.43379	6.99774	7.84925	8.10486	8.64205	7.1164	8.19872	1.08232									15	7	8	19	5	2	1	465	52	6.46	40.71	128	0	5312
Q9D0K2	Succinyl-CoA:3-ketoacid coenzyme A transferase 1, mitochondrial OS=Mus musculus OX=10090 GN=Oxct1 PE=1 SV=1	1.75353	1.72379	0.0188892	6.51254	6.04002	6.48382	7.33002	8.83099	8.13597	6.34546	8.09899	1.75353		Acetyl [N-Term]							12	3	3	4	3	0	2	333	37.4	5.29	14.278	126	0	4612
Q3UND0	Src kinase-associated phosphoprotein 2 OS=Mus musculus OX=10090 GN=Skap2 PE=1 SV=2	0.474401	1.72143	0.0189919	4.60881	4.34341	4.43962	4.75489	5.08746	4.97269	4.46395	4.93835	0.474401									29	16	16	31	16	0	0	648	73.3	6.38	67.584	320	0	5454
Q00PI9	Heterogeneous nuclear ribonucleoprotein U-like protein 2 OS=Mus musculus OX=10090 GN=Hnrnpul2 PE=1 SV=2	0.261587	1.71163	0.0194255	9.06609	8.9263	9.10591	9.3696	9.29163	9.22183	9.03276	9.29435	0.261587									29	13	16	34	13	0	6	474	53.8	5.86	82.448	613	0	4180
E9PYL4	Chloride channel protein OS=Mus musculus OX=10090 GN=Clcn7 PE=1 SV=1	0.994555	1.70928	0.019531	7.23362	6.74685	7.00787	8.38716	7.96867	7.61618	6.99611	7.99067	0.994555									49	17	22	90	3	0	1	130	14	10.89	116.475	1684	0	669
Q8R0G7	Protein spinster homolog 1 OS=Mus musculus OX=10090 GN=Spns1 PE=2 SV=1	1.52553	1.70576	0.0196898	4.10434	4.74953	5.18982	6.65964	5.77873	6.1819	4.68123	6.20676	1.52553									30	10	11	33	9	1	0	399	44.7	6.38	52.171	419	0	4587
Q4FZE8	Major urinary protein 1 OS=Mus musculus OX=10090 GN=Mup22 PE=2 SV=1	-2.82912	1.70025	0.0199412	6.81634	5.59991	5.62059	NaN	2.72247	3.64386	6.01228	3.18316	-2.82912			+						25	11	14	32	11	0	11	452	50.9	5.66	55.403	392	0	3250
Q5FWK3	Rho GTPase-activating protein 1 OS=Mus musculus OX=10090 GN=Arhgap1 PE=1 SV=1	0.462124	1.68811	0.0205065	7.48059	7.29554	7.39146	7.73809	8.07575	7.74012	7.3892	7.85132	0.462124			+						1	1	1	1	1	0	0	1902	218.1	7.77	5.087	44	0	2252
S4R1X1	WD repeat-containing protein 91 OS=Mus musculus OX=10090 GN=Wdr91 PE=1 SV=1	0.880313	1.68723	0.0205481	5.40939	4.79701	5.15785	5.72792	6.27053	6.00675	5.12142	6.00173	0.880313			+						28	9	9	16	8	1	5	264	30.6	5.73	40.51	183	0	3926
P08508	Low affinity immunoglobulin gamma Fc region receptor III OS=Mus musculus OX=10090 GN=Fcgr3 PE=1 SV=1	0.863868	1.68506	0.0206508	3.71149	3.51096	3.49825	4.54844	4.75489	4.00899	3.57357	4.43744	0.863868			+						10	3	3	3	3	0	3	414	48.4	9.38	11.881	24	0	5184
P14576	Signal recognition particle 54 kDa protein OS=Mus musculus OX=10090 GN=Srp54 PE=1 SV=2	-0.284059	1.68289	0.0207542	8.01903	8.01737	8.08534	7.62059	7.87221	7.77676	8.04058	7.75652	-0.284059			+						38	4	5	15	4	0	2	161	17.7	5.15	46.774	429	0	2119
Q99MB1	Toll-like receptor 3 OS=Mus musculus OX=10090 GN=Tlr3 PE=1 SV=2	1.0767	1.68182	0.0208054	4.67243	5.62644	5.39232	6.40088	6.26491	6.2555	5.23039	6.3071	1.0767			+						12	4	4	16	1	0	0	147	16.1	8.18	12.991	195	0	3542
Q07456	Protein AMBP OS=Mus musculus OX=10090 GN=Ambp PE=1 SV=2	0.561863	1.67635	0.0210691	7.17592	7.26491	7.64962	7.99831	7.84109	7.93664	7.36348	7.92535	0.561863			+	+					27	11	12	27	11	0	4	398	45.2	8.72	55.97	255	0	3600
P83741	Serine/threonine-protein kinase WNK1 OS=Mus musculus OX=10090 GN=Wnk1 PE=1 SV=2	0.459193	1.67328	0.0212186	5.78398	5.88753	5.73606	6.06609	6.46923	6.24982	5.80252	6.26172	0.459193									5	2	2	2	2	0	0	295	35.6	7.01	4.564	21	0	2582
Q91ZX7	Prolow-density lipoprotein receptor-related protein 1 OS=Mus musculus OX=10090 GN=Lrp1 PE=1 SV=1	0.59653	1.6707	0.021345	11.3024	10.8315	11.1048	11.7996	11.5058	11.7229	11.0796	11.6761	0.59653			+						2	2	2	4	2	0	0	1164	131.3	6.84	10.566	89	0	2902
P01592	Immunoglobulin J chain OS=Mus musculus OX=10090 GN=Jchain PE=1 SV=4	1.36523	1.67065	0.0213474	3.848	3.30743	3.52356	5.51728	4.3505	4.90689	3.55966	4.92489	1.36523			+						16	7	7	15	6	0	0	491	55.8	7.83	31.429	243	0	3923
Q8BXQ2	GPI transamidase component PIG-T OS=Mus musculus OX=10090 GN=Pigt PE=1 SV=2	0.369449	1.66756	0.0215001	6.73471	6.69349	6.91886	7.17293	7.26679	7.01569	6.78235	7.1518	0.369449									7	3	4	9	3	0	2	520	58.1	5.8	16.731	108	0	4767
P13020-2	Isoform 2 of Gelsolin OS=Mus musculus OX=10090 GN=Gsn	0.914468	1.66733	0.0215115	8.60955	8.25503	8.32463	8.87252	9.61673	9.44336	8.3964	9.31087	0.914468			+	+					16	5	5	8	5	0	0	332	36.5	7.77	17.251	53	0	5120
P57716	Nicastrin OS=Mus musculus OX=10090 GN=Ncstn PE=1 SV=3	1.73045	1.66583	0.021586	9.0983	7.99039	8.40599	10.9169	9.83747	9.93162	8.49823	10.2287	1.73045									7	3	3	3	3	0	0	466	52.6	6.77	6.02	24	0	4002
A0A0R4J092	Beta-mannosidase OS=Mus musculus OX=10090 GN=Manba PE=1 SV=1	0.988241	1.66036	0.0218594	5.06609	5.79961	5.76288	6.69766	6.61765	6.27798	5.54286	6.5311	0.988241			+	+					34	16	22	62	16	0	14	394	44.6	8.46	87.956	729	0	2714
O54782	Epididymis-specific alpha-mannosidase OS=Mus musculus OX=10090 GN=Man2b2 PE=1 SV=2	0.6979	1.65861	0.0219477	7.54767	8.12205	7.99095	8.57403	8.72996	8.45039	7.88689	8.58479	0.6979									56	20	25	101	4	17	4	143	15.1	10.74	124.408	1827	0	2572
P28798	Progranulin OS=Mus musculus OX=10090 GN=Grn PE=1 SV=2	1.36378	1.65681	0.0220389	6.48059	7.25077	7.1179	8.1127	8.88539	7.94251	6.94975	8.31354	1.36378									7	4	4	6	1	0	1	508	54.2	8.76	10.027	49	0	437
Q05793	Basement membrane-specific heparan sulfate proteoglycan core protein OS=Mus musculus OX=10090 GN=Hspg2 PE=1 SV=1	0.701938	1.65606	0.0220771	4.95884	4.32193	4.79181	5.38543	5.44956	5.34341	4.69086	5.3928	0.701938			+						25	16	16	32	13	3	0	731	80.7	5.76	73.395	426	0	3972
Q71KU9	Fibrinogen-like protein 1 OS=Mus musculus OX=10090 GN=Fgl1 PE=1 SV=2	-0.355381	1.65098	0.0223367	6.67525	6.69349	6.61324	6.2211	6.49506	6.19967	6.66066	6.30528	-0.355381		Acetyl [N-Term]							36	54	61	142	49	0	47	1657	188.6	6.48	375.137	2245	0	348
P61226	Ras-related protein Rap-2b OS=Mus musculus OX=10090 GN=Rap2b PE=1 SV=1	0.891042	1.64811	0.0224847	7.71562	7.6837	8.10434	8.48099	9.13545	8.56033	7.83455	8.72559	0.891042									19	5	5	9	5	0	5	329	35.5	7.96	24.502	176	0	4088
Q9D1L9	Ragulator complex protein LAMTOR5 OS=Mus musculus OX=10090 GN=Lamtor5 PE=1 SV=1	1.42398	1.63886	0.0229688	4	3.39232	4.41954	4.848	5.52982	5.70598	3.93729	5.36127	1.42398		Acetyl [N-Term]							46	9	12	19	9	0	1	149	16.8	4.22	49.352	267	0	4043
G3UVV4	Hexokinase-1 OS=Mus musculus OX=10090 GN=Hk1 PE=1 SV=1	0.686948	1.63449	0.0232011	5.63517	6.08534	5.74953	6.36107	6.78267	6.38716	5.82335	6.5103	0.686948									32	29	38	112	29	0	23	966	109.6	5.9	240.229	1903	0	4146
Q8VDQ8	NAD-dependent protein deacetylase sirtuin-2 OS=Mus musculus OX=10090 GN=Sirt2 PE=1 SV=2	0.742787	1.62535	0.0236944	7.19869	7.29002	7.19476	8.32598	7.97556	7.61029	7.22782	7.97061	0.742787									2	2	2	2	2	0	0	911	106.2	6.76	4.566	0	0	1289
B2RXV4	Feline leukemia virus subgroup C receptor-related protein 1 OS=Mus musculus OX=10090 GN=Flvcr1 PE=2 SV=1	0.89111	1.62331	0.0238064	4.10434	4.71699	4.43296	5.42962	5.53916	4.95884	4.4181	5.30921	0.89111			+						19	4	5	14	4	0	1	198	22.1	5.07	34.195	106	0	5438
Q62192	CD180 antigen OS=Mus musculus OX=10090 GN=Cd180 PE=1 SV=2	0.673592	1.62307	0.0238192	4.20945	4.2555	4.04439	4.62644	5.19771	4.70598	4.16978	4.84338	0.673592			+						25	20	24	56	17	3	2	839	96.4	6.76	119.206	921	0	2928
Q9Z0X1	Apoptosis-inducing factor 1, mitochondrial OS=Mus musculus OX=10090 GN=Aifm1 PE=1 SV=1	-0.475362	1.61868	0.0240611	11.6879	11.3138	11.5318	11.0845	10.8807	11.1421	11.5112	11.0358	-0.475362			+	+					15	9	9	22	9	0	1	713	78.3	5.92	48.789	268	0	4733
Q8K1B8	Fermitin family homolog 3 OS=Mus musculus OX=10090 GN=Fermt3 PE=1 SV=1	1.0215	1.61818	0.024089	7.3637	7.53993	7.35138	7.92005	8.89087	8.50859	7.41834	8.43984	1.0215			+						16	8	10	20	1	0	1	413	45.9	5.73	46.233	329	0	2387
Q99N92	39S ribosomal protein L27, mitochondrial OS=Mus musculus OX=10090 GN=Mrpl27 PE=1 SV=1	1.09569	1.61787	0.0241065	4.39917	3.96347	4.43962	5.90207	5.07039	5.11686	4.26742	5.36311	1.09569									74	53	80	259	47	8	28	466	53.7	5.12	404.875	4195	0	5423
Q91XH6	Vesicle transport through interaction with t-SNAREs 1B homolog OS=Mus musculus OX=10090 GN=Vti1b PE=1 SV=1	0.870036	1.61569	0.0242274	6.05311	6.04658	6.30561	6.5744	7.36632	7.07468	6.1351	7.00513	0.870036			+						7	3	3	3	3	0	1	476	51.5	7.81	5.246	20	0	3724
Q00898	Alpha-1-antitrypsin 1-5 OS=Mus musculus OX=10090 GN=Serpina1e PE=1 SV=1	0.90585	1.61516	0.024257	5.25927	5.12928	5.01346	6.03562	5.61471	6.46923	5.13401	6.03986	0.90585									29	7	8	10	7	0	2	217	25.2	6.32	28.728	139	0	2088
Q9WUD0	Cytochrome P450 2B10 OS=Mus musculus OX=10090 GN=Cyp2b10 PE=1 SV=1	0.931324	1.61449	0.0242948	7.13134	7.30925	7.18785	8.54651	7.65964	8.21626	7.20948	8.1408	0.931324									40	17	21	91	8	9	8	304	33.4	8.88	131.454	1763	0	4286
Q4VC33	E3 ubiquitin-protein transferase MAEA OS=Mus musculus OX=10090 GN=Maea PE=1 SV=1	0.422126	1.60752	0.0246876	4.87283	4.8125	4.98185	5.50462	5.12515	5.30378	4.88906	5.31119	0.422126									35	6	6	15	6	0	0	201	22.9	5.66	32.387	221	0	4098
Q9CRY7	Lysophospholipase D GDPD1 OS=Mus musculus OX=10090 GN=Gdpd1 PE=1 SV=1	0.42942	1.6066	0.0247403	6.42459	6.28725	6.29278	6.69209	6.98755	6.61324	6.33487	6.76429	0.42942									64	36	48	148	12	33	12	531	57.8	7.47	314.142	2426	0	216
Q9DC37	Major facilitator superfamily domain-containing protein 1 OS=Mus musculus OX=10090 GN=Mfsd1 PE=1 SV=1	0.520969	1.59921	0.0251649	5.58195	6.0268	5.87036	6.49025	6.30195	6.24982	5.82637	6.34734	0.520969		Acetyl [N-Term]							72	12	16	56	12	0	10	135	14.9	5.49	98.827	997	0	3265
P49282	Natural resistance-associated macrophage protein 2 OS=Mus musculus OX=10090 GN=Slc11a2 PE=1 SV=2	0.812811	1.59397	0.0254702	7.76421	7.48543	7.73809	8.90809	8.26209	8.25597	7.66258	8.47539	0.812811			+						2	1	1	1	1	0	0	560	60.4	5.68	2.997	0	0.003	1812
Q9D1Q4	Dolichol-phosphate mannosyltransferase subunit 3 OS=Mus musculus OX=10090 GN=Dpm3 PE=1 SV=1	-0.134721	1.59286	0.0255352	6.38198	6.43962	6.32912	6.23074	6.29278	6.22304	6.38357	6.24885	-0.134721			+						48	9	9	17	6	3	5	183	20.5	4.81	41.511	150	0	4239
Q99KE1	NAD-dependent malic enzyme, mitochondrial OS=Mus musculus OX=10090 GN=Me2 PE=1 SV=1	0.742832	1.59102	0.0256434	6.04221	5.72792	5.91648	6.40088	7.02237	6.49185	5.89553	6.63837	0.742832			+	+					33	16	21	54	16	0	14	577	64.5	5.14	131.796	1088	0	2751
Q3UMW8	Ceroid-lipofuscinosis neuronal protein 5 homolog OS=Mus musculus OX=10090 GN=Cln5 PE=1 SV=1	0.601346	1.58723	0.0258684	6.24603	5.93074	6.12309	6.97039	6.67243	6.46107	6.09995	6.7013	0.601346			+	+					16	9	9	17	9	0	1	629	71.3	7.88	41.548	163	0	5512
E9Q2H1	E3 ubiquitin-protein ligase UBR5 OS=Mus musculus OX=10090 GN=Ubr5 PE=1 SV=2	0.525482	1.58528	0.025985	4.10434	4.42626	3.97269	4.82273	4.57894	4.67807	4.16776	4.69325	0.525482		Acetyl [N-Term]	+	+					7	4	4	12	4	0	0	964	103.8	4.92	25.873	180	0	3311
Q9JJ00	Phospholipid scramblase 1 OS=Mus musculus OX=10090 GN=Plscr1 PE=1 SV=1	0.540057	1.57943	0.0263375	8.23122	8.46148	8.59507	9.0917	9.07815	8.73809	8.42926	8.96931	0.540057			+						6	3	3	7	3	0	0	604	67.7	6.67	11.031	30	0	2642
Q9QZ06	Toll-interacting protein OS=Mus musculus OX=10090 GN=Tollip PE=1 SV=1	0.80099	1.5766	0.0265096	6.27053	5.89482	6.57289	6.82909	7.26772	7.04439	6.24608	7.04707	0.80099			+	+					38	6	7	9	6	0	6	167	19.3	5.31	24.341	117	0	4169
Q9CPR5	39S ribosomal protein L15, mitochondrial OS=Mus musculus OX=10090 GN=Mrpl15 PE=1 SV=1	-0.496736	1.57487	0.0266153	7.02791	6.53605	6.82528	6.29646	6.25739	6.34518	6.79641	6.29968	-0.496736			+						7	7	7	21	7	0	6	1169	129.1	6.64	46.401	251	0	1952
O89053	Coronin-1A OS=Mus musculus OX=10090 GN=Coro1a PE=1 SV=5	1.58328	1.568	0.0270393	7.82273	7.76487	7.46352	8.42375	9.96506	9.41215	7.68371	9.26699	1.58328			+						9	2	2	2	2	0	0	235	26.8	5.02	6.591	18	0	508
Q9DC51	Guanine nucleotide-binding protein G(i) subunit alpha OS=Mus musculus OX=10090 GN=Gnai3 PE=1 SV=3	0.232369	1.56562	0.0271881	8.2427	8.24365	8.35491	8.60103	8.53177	8.40557	8.28042	8.51279	0.232369									10	6	6	15	1	0	1	630	70.4	5.38	21.68	49	0	2718
Q3ULB1	Testin OS=Mus musculus OX=10090 GN=Tes PE=1 SV=1	-0.521194	1.56486	0.0272359	7.07788	7.06286	7.48784	6.5744	6.79571	6.69488	7.20953	6.68833	-0.521194									55	40	49	130	30	13	29	577	67.7	6.6	201.696	1212	0	968
P62814	V-type proton ATPase subunit B, brain isoform OS=Mus musculus OX=10090 GN=Atp6v1b2 PE=1 SV=1	1.12451	1.55799	0.0276698	9.46046	9.35997	9.5467	9.95928	11.0731	10.7083	9.45571	10.5802	1.12451		Acetyl [N-Term]	+						14	3	3	4	3	0	0	232	26.7	9.04	9.041	61	0	2035
Q99P91	Transmembrane glycoprotein NMB OS=Mus musculus OX=10090 GN=Gpnmb PE=1 SV=2	1.00356	1.55763	0.0276931	5.99548	6.0917	5.65249	6.75889	7.43379	6.55766	5.91322	6.91678	1.00356			+						9	2	2	2	2	0	1	186	21	6.06	2.633	28	0.005	3524
Q8K2J7	RELT-like protein 1 OS=Mus musculus OX=10090 GN=Rell1 PE=2 SV=2	0.43937	1.5497	0.028203	4.89724	4.63227	4.52982	5.16993	5.2211	4.98641	4.68644	5.12581	0.43937		Acetyl [N-Term]							37	11	13	36	11	0	2	372	41	8.35	70.787	655	0	1314
Q9D5V5	Cullin-5 OS=Mus musculus OX=10090 GN=Cul5 PE=1 SV=3	-0.484146	1.54906	0.0282452	5.08746	4.74953	4.60881	4.30743	4.37851	4.30743	4.81527	4.33112	-0.484146									26	10	11	21	3	0	2	470	54.7	7.43	60.165	328	0	3844
Q75N73	Metal cation symporter ZIP14 OS=Mus musculus OX=10090 GN=Slc39a14 PE=1 SV=1	-0.361844	1.54874	0.0282656	8.45738	8.20457	8.14415	7.81186	7.93487	7.97384	8.2687	7.90686	-0.361844			+						13	4	4	5	1	0	0	261	30	9.29	12.901	34	0	2094
A7E1Z5	Anion exchange protein OS=Mus musculus OX=10090 GN=Slc4a4 PE=1 SV=1	0.750872	1.54861	0.0282739	4.37851	4.54226	4.82273	5.56072	4.97269	5.46271	4.58117	5.33204	0.750872			+						17	13	13	24	12	1	1	889	101.2	6.96	68.176	345	0	498
P51150	Ras-related protein Rab-7a OS=Mus musculus OX=10090 GN=Rab7a PE=1 SV=2	0.966528	1.54785	0.0283237	10.063	10.1303	10.2874	10.5884	11.5291	11.2627	10.1602	11.1268	0.966528									51	23	27	62	23	0	15	418	47.3	5.88	122.924	846	0	5050
Q9JME7	Trafficking protein particle complex subunit 2-like protein OS=Mus musculus OX=10090 GN=Trappc2l PE=1 SV=1	0.432735	1.54517	0.0284989	6.32733	5.90929	6.1416	6.59395	6.61324	6.46923	6.12607	6.55881	0.432735			+						35	8	10	24	8	0	6	306	34.5	8	59.017	439	0	850
Q99LM2	CDK5 regulatory subunit-associated protein 3 OS=Mus musculus OX=10090 GN=Cdk5rap3 PE=1 SV=1	-0.497509	1.54294	0.0286457	7.38629	7.42122	7.52042	6.65964	7.07039	7.10538	7.44265	6.94514	-0.497509									4	2	2	2	2	0	1	592	66	8.1	5.315	13	0	5265
O70145	Neutrophil cytosol factor 2 OS=Mus musculus OX=10090 GN=Ncf2 PE=1 SV=1	1.17152	1.54236	0.0286841	6.21723	6.18982	6.08958	6.6851	7.87406	7.45204	6.16555	7.33706	1.17152			+	+					18	7	7	15	7	0	0	313	36.5	7.72	18.235	132	0	5130
Q8BP48	Methionine aminopeptidase 1 OS=Mus musculus OX=10090 GN=Metap1 PE=1 SV=1	-0.632842	1.53924	0.0288906	6.90929	6.62059	6.95536	5.91169	6.45779	6.21723	6.82841	6.19557	-0.632842									3	1	1	1	1	0	1	326	37.9	7.94	2.733	0	0.004	5203
Q99104	Unconventional myosin-Va OS=Mus musculus OX=10090 GN=Myo5a PE=1 SV=2	0.996264	1.53899	0.0289073	4.56682	3.81762	4.57289	5.07468	5.62352	5.24793	4.31911	5.31537	0.996264									8	1	1	1	1	0	1	195	22.2	9.39	6.035	68	0	4361
F8WHM0	CD48 antigen OS=Mus musculus OX=10090 GN=Cd48 PE=1 SV=1	1.54242	1.53587	0.0291161	4.41954	3.58496	3.53605	5.91169	5.56682	4.6893	3.84685	5.38927	1.54242		Acetyl [N-Term]	+	+					52	6	7	14	6	0	1	101	11.4	8.19	29.229	140	0	2272
Q9JIZ0	Probable N-acetyltransferase CML1 OS=Mus musculus OX=10090 GN=Cml1 PE=1 SV=1	-0.905279	1.5356	0.029134	9.70874	9.13878	8.97068	8.66142	8.13443	8.30652	9.27273	8.36746	-0.905279			+						21	14	14	26	13	1	0	674	77.5	7.39	51.122	289	0	4840
P51863	V-type proton ATPase subunit d 1 OS=Mus musculus OX=10090 GN=Atp6v0d1 PE=1 SV=2	1.311	1.53507	0.0291696	10.5666	9.60899	9.92318	11.8945	11.0635	11.0739	10.0329	11.3439	1.311		Acetyl [N-Term]							51	8	9	29	8	0	7	168	19.7	8.43	34.669	241	0	1500
P29391	Ferritin light chain 1 OS=Mus musculus OX=10090 GN=Ftl1 PE=1 SV=2	0.720414	1.53487	0.0291833	8.91886	9.47411	9.33293	9.69244	10.0452	10.1495	9.24197	9.96238	0.720414									5	2	2	4	2	0	0	265	29	7.9	14.575	94	0	2262
Q3TWI9	CSC1-like protein 2 OS=Mus musculus OX=10090 GN=Tmem63b PE=1 SV=1	-0.254578	1.53315	0.0292986	5.08746	5.17792	4.99095	4.89239	4.87774	4.72247	5.08545	4.83087	-0.254578			+						7	2	2	3	2	0	0	447	49.3	6.73	12.544	64	0	387
O08677-2	Isoform LMW of Kininogen-1 OS=Mus musculus OX=10090 GN=Kng1	0.656333	1.53285	0.0293193	7.80349	8.06178	7.65821	8.36982	8.31016	8.8125	7.84116	8.49749	0.656333									30	11	14	51	11	0	11	394	44.7	6.74	84.517	691	0	2669
Q9CQE5	Regulator of G-protein signaling 10 OS=Mus musculus OX=10090 GN=Rgs10 PE=1 SV=1	1.47558	1.53101	0.0294437	3.49825	3.26303	2.7866	NaN	5.00899	4.30743	3.18263	4.65821	1.47558			+	+					29	7	7	10	7	0	1	308	34.9	6.28	23.856	91	0	2920
Q8VCA8	Secernin-2 OS=Mus musculus OX=10090 GN=Scrn2 PE=1 SV=1	-0.204123	1.52603	0.0297829	5.58195	5.55459	5.4822	5.41616	5.23266	5.35755	5.53958	5.33546	-0.204123			+						4	1	1	3	1	0	0	230	25.1	8.02	3.036	0	0.003	2385
Q8K0B2	Probable lysosomal cobalamin transporter OS=Mus musculus OX=10090 GN=Lmbrd1 PE=1 SV=1	1.14212	1.52503	0.0298521	6.1918	6.49346	6.3345	8.14975	7.18785	7.10852	6.33992	7.48204	1.14212									35	8	9	19	8	0	3	224	24.3	4.72	45.682	231	0	3937
Q3U481	Major facilitator superfamily domain-containing protein 12 OS=Mus musculus OX=10090 GN=Mfsd12 PE=1 SV=1	0.905485	1.52376	0.0299392	3.71149	3.81762	3.41954	4.97728	4.12102	4.56682	3.64955	4.55504	0.905485									26	3	4	13	3	0	2	130	13.8	7.05	25.775	180	0	5476
Q8K4Q8	Collectin-12 OS=Mus musculus OX=10090 GN=Colec12 PE=1 SV=1	0.623331	1.52143	0.0301002	5.83542	6.28725	6.2384	6.69766	6.97728	6.55612	6.12036	6.74369	0.623331									7	1	1	2	1	0	1	147	17.3	9.5	5.192	46	0	4623
Q99P27	Group XIIB secretory phospholipase A2-like protein OS=Mus musculus OX=10090 GN=Pla2g12b PE=1 SV=1	0.632006	1.51677	0.0304249	5.37156	5.37851	5.22497	6.0268	5.60585	6.2384	5.32501	5.95702	0.632006									18	14	15	27	11	2	0	917	102.5	6.11	66.443	298	0	2084
Q9ERU9	E3 SUMO-protein ligase RanBP2 OS=Mus musculus OX=10090 GN=Ranbp2 PE=1 SV=2	-0.239547	1.51407	0.0306147	7.95303	8.00562	7.97728	7.59768	7.79116	7.82845	7.97865	7.7391	-0.239547			+						2	2	2	5	2	0	0	732	83.8	5.95	10.063	39	0	290
A0A1B0GSU2	Mitochondrial import inner membrane translocase subunit Tim10 B OS=Mus musculus OX=10090 GN=Timm10b PE=1 SV=1	0.564617	1.51218	0.0307483	4.12928	4.42626	4.63807	4.93546	5.12928	4.82273	4.39787	4.96249	0.564617									32	8	9	26	7	1	2	289	32.5	6.6	48.109	346	0	1895
E9Q3X0	Major vault protein OS=Mus musculus OX=10090 GN=Mvp PE=1 SV=1	0.712328	1.51045	0.0308708	4.51728	4.40599	4.82273	5.56072	5.36807	4.9542	4.582	5.29433	0.712328		Acetyl [N-Term]	+						60	30	40	133	6	0	6	298	32.9	9.72	177.616	1786	0	746
D3Z494	Aldo-keto reductase family 1, member B10 (aldose reductase) OS=Mus musculus OX=10090 GN=Akr1b10 PE=1 SV=1	1.35178	1.50476	0.0312784	3.6893	4.46597	3.58496	4.67807	5.7252	5.39232	3.91341	5.2652	1.35178									40	9	9	19	9	0	1	240	26.8	5.14	43.592	283	0	3207
P41731	CD63 antigen OS=Mus musculus OX=10090 GN=Cd63 PE=1 SV=2	1.92469	1.50245	0.0314447	8.08321	9.34207	9.62169	10.4618	11.6382	10.7211	9.01566	10.9403	1.92469			+	+					16	3	4	7	3	0	3	187	20.9	8.59	18.998	196	0	1770
Q8CFE6	Sodium-coupled neutral amino acid transporter 2 OS=Mus musculus OX=10090 GN=Slc38a2 PE=1 SV=1	-0.393117	1.49991	0.0316291	4.74416	5.11686	4.79181	4.54844	4.43962	4.48543	4.88428	4.49116	-0.393117			+	+					27	13	13	25	13	0	13	528	60.6	6.54	45.501	131	0	3322
Q8BH40	Syntaxin-7 OS=Mus musculus OX=10090 GN=Stx7 PE=1 SV=1	0.679458	1.49856	0.0317279	5.99548	5.60881	5.92125	6.20359	6.79961	6.56072	5.84185	6.5213	0.679458			+						6	3	4	11	3	0	1	568	62.3	5.99	16.942	126	0	5529
Q9CZW5	Mitochondrial import receptor subunit TOM70 OS=Mus musculus OX=10090 GN=Tomm70 PE=1 SV=2	-0.535574	1.49825	0.0317504	11.7659	11.2656	11.3	10.933	10.8364	10.9554	11.4438	10.9083	-0.535574			+						9	3	3	4	3	0	0	446	47.1	6.87	18.466	124	0	747
Q9Z1G4	V-type proton ATPase 116 kDa subunit a isoform 1 OS=Mus musculus OX=10090 GN=Atp6v0a1 PE=1 SV=3	0.908934	1.49646	0.0318812	9.56377	8.76288	9.12412	10.3565	10.0104	9.81073	9.15026	10.0592	0.908934									28	26	34	83	26	0	18	930	106.5	6.2	175.358	1055	0	2499
Q9DCI3	STARD3 N-terminal-like protein OS=Mus musculus OX=10090 GN=Stard3nl PE=1 SV=2	0.873387	1.4951	0.0319815	5.16993	5.29278	5.06609	6.56682	5.8679	5.71425	5.17627	6.04965	0.873387									5	2	2	2	2	0	0	331	35.2	6.2	5.983	38	0	1965
Q9CQN1	Heat shock protein 75 kDa, mitochondrial OS=Mus musculus OX=10090 GN=Trap1 PE=1 SV=1	-0.139987	1.49215	0.0321996	10.9363	11.0109	11.0488	10.9099	10.8535	10.8127	10.9987	10.8587	-0.139987									61	44	62	199	40	4	22	697	76.7	7.18	364.796	3096	0	3511
Q9JIS8	Solute carrier family 12 member 4 OS=Mus musculus OX=10090 GN=Slc12a4 PE=1 SV=2	0.465388	1.48775	0.0325275	7.18587	7.07895	6.91886	7.75288	7.49426	7.33271	7.06123	7.52662	0.465388			+						24	4	4	11	4	0	0	274	30.3	5.17	22.552	101	0	2219
F6RYG0	All-trans retinoic acid-induced differentiation factor (Fragment) OS=Mus musculus OX=10090 GN=Atraid PE=1 SV=1	1.83503	1.4839	0.0328169	6.76951	5.37851	5.82273	8.62242	7.3672	7.48623	5.99025	7.82528	1.83503									7	2	2	4	2	0	2	338	38	6.39	6.865	45	0	3855
P52019	Squalene monooxygenase OS=Mus musculus OX=10090 GN=Sqle PE=2 SV=1	-0.435226	1.4821	0.0329535	6.09592	6.30925	6.56529	5.90207	5.89482	5.8679	6.32349	5.88826	-0.435226		Acetyl [N-Term]							28	3	3	7	3	0	0	79	8.9	9.29	12.405	86	0	287
A0A1B0GSZ9	39S ribosomal protein L23, mitochondrial OS=Mus musculus OX=10090 GN=Mrpl23 PE=1 SV=1	0.237384	1.47735	0.0333158	6.02459	6.01346	5.87529	6.19574	6.31288	6.11686	5.97111	6.2085	0.237384			+						5	5	5	6	5	0	0	926	102.6	4.78	16.874	51	0	2742
Q5PT54	Sodium/bile acid cotransporter 5 OS=Mus musculus OX=10090 GN=Slc10a5 PE=2 SV=1	-0.468536	1.47145	0.0337715	6.66391	6.26491	6.2891	5.79961	5.97269	6.04002	6.40597	5.93744	-0.468536									27	13	13	30	12	1	5	507	56.6	5.43	49.104	172	0	623
Q99M01	Phenylalanine--tRNA ligase, mitochondrial OS=Mus musculus OX=10090 GN=Fars2 PE=1 SV=1	-0.34297	1.47052	0.0338437	5.67807	6.00675	5.89724	5.47573	5.46271	5.61471	5.86069	5.51772	-0.34297									8	3	3	3	2	0	2	411	46.6	4.88	9.675	44	0	2165
Q91XE0	Glycine N-acyltransferase OS=Mus musculus OX=10090 GN=Glyat PE=1 SV=1	-0.622546	1.46746	0.034083	10.7275	10.7665	11.2739	10.1522	10.2912	10.457	10.9226	10.3001	-0.622546			+						28	38	44	106	37	2	18	1476	165.2	6.42	202.462	1218	0	2938
Q91W86	Vacuolar protein sorting-associated protein 11 homolog OS=Mus musculus OX=10090 GN=Vps11 PE=1 SV=3	0.374977	1.46606	0.0341935	5.78398	5.8802	5.64097	6.30561	6.15178	5.97269	5.76838	6.14336	0.374977		Acetyl [N-Term]							8	8	8	19	8	0	7	1138	126.3	8.72	37.128	211	0	5444
Q920A5	Retinoid-inducible serine carboxypeptidase OS=Mus musculus OX=10090 GN=Scpep1 PE=1 SV=2	0.948631	1.46356	0.0343904	9.14032	9.62169	9.63826	9.97484	10.8499	10.4214	9.46675	10.4154	0.948631									14	6	8	31	6	0	6	562	61.3	6.57	53.14	713	0	5410
Q9EQH3	Vacuolar protein sorting-associated protein 35 OS=Mus musculus OX=10090 GN=Vps35 PE=1 SV=1	0.388984	1.46231	0.0344898	9.06609	9.26702	9.0864	9.35005	9.71579	9.52062	9.13984	9.52882	0.388984									40	17	17	46	17	0	13	460	51.3	7.8	85.463	680	0	5485
P56657	Cytochrome P450 2C40 OS=Mus musculus OX=10090 GN=Cyp2c40 PE=1 SV=2	-0.983692	1.46129	0.0345711	10.7674	9.85347	10.157	9.53177	8.98328	9.31175	10.2593	9.2756	-0.983692			+						29	10	10	13	2	8	1	315	37	4.67	41.633	149	0	4221
Q9CZM2	60S ribosomal protein L15 OS=Mus musculus OX=10090 GN=Rpl15 PE=1 SV=4	-0.332412	1.45909	0.0347466	10.3599	10.1533	10.1232	9.74315	10.0025	9.89345	10.2121	9.87971	-0.332412		Acetyl [N-Term]							45	20	27	99	20	0	16	474	51.5	7.52	163.108	1388	0	4425
Q91VR8	Protein BRICK1 OS=Mus musculus OX=10090 GN=Brk1 PE=1 SV=1	0.296927	1.45907	0.0347479	5.93074	6.01346	5.89482	6.38543	6.26115	6.08321	5.94634	6.24327	0.296927									6	4	4	5	4	0	4	732	83.2	5.92	11.485	49	0	4055
P61028	Ras-related protein Rab-8B OS=Mus musculus OX=10090 GN=Rab8b PE=1 SV=1	1.41342	1.45886	0.0347647	6.52513	6.58045	6.24982	7.07039	8.58158	7.94369	6.4518	7.86522	1.41342									18	2	2	2	2	0	0	152	16.2	8.75	7.799	58	0	2463
Q80U63	Mitofusin-2 OS=Mus musculus OX=10090 GN=Mfn2 PE=1 SV=3	-0.41919	1.45784	0.0348465	8.20016	7.87036	7.83983	7.53294	7.4446	7.67525	7.97012	7.55093	-0.41919			+	+					50	11	13	39	9	3	3	286	32.9	5.85	103.67	1061	0	4714
P60904	DnaJ homolog subfamily C member 5 OS=Mus musculus OX=10090 GN=Dnajc5 PE=1 SV=1	0.911142	1.45756	0.0348694	7.86666	7.32553	7.69488	9.02486	8.29094	8.30469	7.62902	8.54017	0.911142									10	7	7	14	7	0	6	771	84.9	5.4	33.234	158	0	1374
Q9Z0Y1	Dynactin subunit 3 OS=Mus musculus OX=10090 GN=Dctn3 PE=1 SV=2	0.869376	1.45263	0.0352669	3.76553	4.63227	4.40599	5.03562	5.33628	5.04002	4.26793	5.13731	0.869376			+						12	4	4	5	4	0	0	513	56.4	8.28	18.897	138	0	4996
Q00623	Apolipoprotein A-I OS=Mus musculus OX=10090 GN=Apoa1 PE=1 SV=2	0.944392	1.44885	0.0355757	8.44253	7.66463	7.89785	9.28702	8.60659	8.94457	8.00167	8.94606	0.944392									18	7	7	9	7	0	5	462	52.3	6.89	34.751	112	0	1129
Q6ZWM4	U6 snRNA-associated Sm-like protein LSm8 OS=Mus musculus OX=10090 GN=Lsm8 PE=1 SV=3	-0.783132	1.44785	0.0356574	5.99095	5.39917	5.37504	4.7761	5.07895	4.56072	5.58839	4.80526	-0.783132			+	+					14	1	1	1	1	0	0	112	12.2	5.12	11.204	46	0	1552
H7BX88	Carnitine O-acetyltransferase OS=Mus musculus OX=10090 GN=Crat PE=1 SV=1	0.449975	1.44652	0.0357668	8.02625	7.85736	8.25739	8.41236	8.66959	8.40897	8.047	8.49697	0.449975									8	8	8	13	8	0	4	1159	134	7.12	34.515	102	0	751
Q9WU81	Glucose-6-phosphate exchanger SLC37A2 OS=Mus musculus OX=10090 GN=Slc37a2 PE=1 SV=1	2.37516	1.44495	0.0358961	4.75489	4.12102	4.49185	5.54535	8.11374	6.83416	4.45592	6.83108	2.37516									46	21	26	60	21	0	12	476	53.6	5.5	164.891	936	0	5218
E9PYK0	Protein unc-93 homolog B1 OS=Mus musculus OX=10090 GN=Unc93b1 PE=1 SV=1	1.20354	1.44454	0.0359301	4.36457	3.07039	3.94486	5.1127	5	4.87774	3.79327	4.99681	1.20354									73	30	35	128	15	16	5	364	39.3	8.09	221.349	2895	0	5513
P04117	Fatty acid-binding protein, adipocyte OS=Mus musculus OX=10090 GN=Fabp4 PE=1 SV=3	2.32335	1.44066	0.0362526	6.89966	7.53993	7.10643	8.06555	10.3819	10.0686	7.18201	9.50535	2.32335			+						16	5	6	9	5	0	1	263	28.3	7.84	22.989	179	0	5054
Q9CRA5	Golgi phosphoprotein 3 OS=Mus musculus OX=10090 GN=Golph3 PE=1 SV=1	0.523471	1.44007	0.0363022	4.64386	4.07039	4.38543	4.848	4.9542	4.8679	4.36656	4.89003	0.523471		Acetyl [N-Term]							21	8	8	20	4	4	3	316	36.1	6.37	21.868	113	0	4780
Q3UW53	Protein Niban 1 OS=Mus musculus OX=10090 GN=Niban1 PE=1 SV=2	0.794831	1.43385	0.0368259	3.63227	4.52356	4.08746	4.8679	4.90689	4.853	4.0811	4.87593	0.794831									15	2	2	6	2	0	0	163	17.9	9.38	18.242	179	0	499
P35278	Ras-related protein Rab-5C OS=Mus musculus OX=10090 GN=Rab5c PE=1 SV=2	0.355213	1.43169	0.0370092	9.18958	8.93251	8.86913	9.38522	9.43754	9.2341	8.99707	9.35229	0.355213									12	5	5	7	5	0	3	524	57.5	7.01	24.67	88	0	3468
P28665	Murinoglobulin-1 OS=Mus musculus OX=10090 GN=Mug1 PE=1 SV=3	0.7888	1.42963	0.0371853	9.51629	9.26913	9.26444	9.74029	10.0975	10.5785	9.34995	10.1388	0.7888			+						6	5	6	11	5	0	0	1070	120.4	6.84	27.864	145	0	1161
G3X8X7	Vacuolar protein sorting-associated protein 16 homolog OS=Mus musculus OX=10090 GN=Vps16 PE=1 SV=1	0.519475	1.42885	0.037252	6.27053	6.63372	6.60733	6.78267	7.1809	7.10643	6.50386	7.02334	0.519475		Acetyl [N-Term]							38	13	16	45	13	0	8	327	34.6	7.12	94.003	932	0	801
Q9Z2I0	Mitochondrial proton/calcium exchanger protein OS=Mus musculus OX=10090 GN=Letm1 PE=1 SV=1	-0.530922	1.42331	0.0377306	10.6917	10.4319	10.6699	9.78136	10.1176	10.3018	10.5979	10.0669	-0.530922		Acetyl [N-Term]							17	11	11	27	11	0	0	708	80.8	6.76	50.743	494	0	1184
Q8BTU1	Cilia- and flagella-associated protein 20 OS=Mus musculus OX=10090 GN=Cfap20 PE=1 SV=1	0.463606	1.42146	0.0378915	3.94486	3.7866	4.06178	4.45943	4.57894	4.14568	3.93108	4.39468	0.463606			+						48	15	16	24	13	2	1	271	31.9	6.37	50.25	84	0	3547
P97930	Thymidylate kinase OS=Mus musculus OX=10090 GN=Dtymk PE=1 SV=2	-0.487719	1.42001	0.0380182	5.11686	5.35755	5.37156	4.57289	5.04439	4.76553	5.28199	4.79427	-0.487719									10	2	2	4	2	0	2	261	29.1	7.44	11.13	17	0	2069
Q99L04	Dehydrogenase/reductase SDR family member 1 OS=Mus musculus OX=10090 GN=Dhrs1 PE=1 SV=1	-0.423678	1.41653	0.0383239	10.6826	10.2235	10.3819	9.93561	10.0527	10.0286	10.4293	10.0056	-0.423678									52	11	14	51	3	0	0	136	15.3	11.27	72.837	517	0	275
Q8CC88	von Willebrand factor A domain-containing protein 8 OS=Mus musculus OX=10090 GN=Vwa8 PE=1 SV=2	-0.291862	1.40937	0.0389607	8.17343	8.43421	8.47452	8.108	8.04166	8.05691	8.36072	8.06886	-0.291862			+						12	5	5	7	5	0	5	589	65.8	7.61	27.343	97	0	3275
Q99JI6	Ras-related protein Rap-1b OS=Mus musculus OX=10090 GN=Rap1b PE=1 SV=2	0.637392	1.40474	0.0393786	9.97083	9.8586	9.76288	10.248	10.9023	10.3541	9.8641	10.5015	0.637392			+						17	6	7	10	6	0	1	389	43.2	5.35	29.011	137	0	255
D3Z2K2	28S ribosomal protein S14, mitochondrial OS=Mus musculus OX=10090 GN=Mrps14 PE=1 SV=1	-0.158209	1.40181	0.0396449	6.93899	6.94953	7.03782	6.74147	6.82273	6.88753	6.97545	6.81724	-0.158209			+	+					41	5	5	14	5	0	2	119	13.4	5.82	26.653	112	0	363
Q76LS9	Ubiquitin carboxyl-terminal hydrolase MINDY-1 OS=Mus musculus OX=10090 GN=Mindy1 PE=1 SV=1	0.521726	1.40099	0.0397204	5.70044	5.94486	5.72792	6.06609	6.59991	6.2724	5.79107	6.3128	0.521726									21	3	4	12	3	0	3	153	16.9	9.5	23.301	207	0	839
A2AF67	Dedicator of cytokinesis protein 11 OS=Mus musculus OX=10090 GN=Dock11 PE=1 SV=1	0.945734	1.39946	0.0398602	3.89724	4.79701	4.63807	5.09592	5.58496	5.48864	4.44411	5.38984	0.945734			+						20	9	9	13	9	0	9	575	63.7	5.64	35.557	213	0	4618
P21460	Cystatin-C OS=Mus musculus OX=10090 GN=Cst3 PE=1 SV=2	1.55303	1.39605	0.040174	3.926	2.90689	3.41954	5.82273	4.59694	4.49185	3.41748	4.97051	1.55303		Acetyl [N-Term]							18	3	3	7	3	0	3	198	21.8	5.82	18.646	177	0	4606
F8WGM5	Syntaxin-binding protein 2 (Fragment) OS=Mus musculus OX=10090 GN=Stxbp2 PE=1 SV=1	0.722017	1.39432	0.0403344	7.75556	7.84612	7.77676	8.11998	8.94837	8.47614	7.79281	8.51483	0.722017									61	33	47	141	33	0	32	416	48	4.49	256.997	1663	0	1098
Q91WS0	CDGSH iron-sulfur domain-containing protein 1 OS=Mus musculus OX=10090 GN=Cisd1 PE=1 SV=1	-0.449369	1.39385	0.0403788	9.49185	9.14568	9.26819	8.99322	8.63336	8.93103	9.30191	8.85254	-0.449369									46	19	20	41	19	0	0	459	53.4	5.07	97.35	553	0	1684
Q9Z2I9	Succinate--CoA ligase [ADP-forming] subunit beta, mitochondrial OS=Mus musculus OX=10090 GN=Sucla2 PE=1 SV=2	-0.372687	1.39009	0.0407295	11.9173	12.0702	12.1878	11.8804	11.5792	11.5975	12.0584	11.6857	-0.372687									33	11	11	43	1	0	0	366	41.3	7.99	61.091	657	0	2191
B9EJ86	Oxysterol-binding protein-related protein 8 OS=Mus musculus OX=10090 GN=Osbpl8 PE=1 SV=1	0.859467	1.38868	0.0408621	7.24127	6.78267	7.14364	7.47573	8.35138	7.91886	7.05586	7.91533	0.859467			+						25	3	3	4	3	0	3	149	16.4	7.68	12.154	51	0	2579
Q8BYB9	Protein O-glucosyltransferase 1 OS=Mus musculus OX=10090 GN=Poglut1 PE=1 SV=2	0.372619	1.38782	0.040943	6.46761	6.54998	6.53138	6.76553	7.13443	6.76686	6.51632	6.88894	0.372619									24	13	13	56	12	1	9	474	53.1	7.08	73.758	919	0	2640
Q3TMP1	General transcription factor IIIC, polypeptide 3 OS=Mus musculus OX=10090 GN=Gtf3c3 PE=1 SV=1	0.260867	1.38764	0.0409598	4.91169	4.66676	4.79701	5.03562	4.97269	5.14975	4.79182	5.05269	0.260867									23	9	9	21	9	0	9	422	47.8	7.03	44.117	266	0	3084
O88696	ATP-dependent Clp protease proteolytic subunit, mitochondrial OS=Mus musculus OX=10090 GN=Clpp PE=1 SV=1	-0.327436	1.38749	0.0409744	8.60103	8.43671	8.79831	8.3097	8.21626	8.32778	8.61202	8.28458	-0.327436									14	3	3	6	3	0	2	224	25.2	6.34	12.176	67	0	5038
Q9CZG3	COMM domain-containing protein 8 OS=Mus musculus OX=10090 GN=Commd8 PE=1 SV=1	0.15662	1.38596	0.0411188	4.74416	4.82782	4.67243	4.8679	4.88753	4.95884	4.74814	4.90475	0.15662			+						24	11	11	22	11	0	0	594	66.4	6.74	43.12	219	0	3021
A0A1W2P6N8	Collagen alpha-1(XVIII) chain (Fragment) OS=Mus musculus OX=10090 GN=Col18a1 PE=1 SV=1	0.443821	1.38593	0.041122	4.20945	NaN	4.06178	4.67807	4.39917	4.66107	4.13561	4.57944	0.443821			+	+					33	5	7	22	5	0	4	137	14.9	7.4	59.937	641	0	5531
Q8BH31	Major facilitator superfamily domain-containing protein 8 OS=Mus musculus OX=10090 GN=Mfsd8 PE=2 SV=1	1.76669	1.3853	0.0411816	4.08746	2.65535	3.18587	5.88996	4.46597	4.87283	3.30956	5.07625	1.76669			+						68	12	19	58	12	0	3	183	20.8	6	133.955	1355	0	2755
Q9D394	Protein RUFY3 OS=Mus musculus OX=10090 GN=Rufy3 PE=1 SV=1	0.398437	1.38483	0.0412257	6.23074	6.44956	6.08108	6.51096	6.79181	6.65392	6.2538	6.65223	0.398437		Acetyl [N-Term]	+						43	9	9	24	9	0	5	223	25.1	6.68	36.921	374	0	981
Q91ZW3	SWI/SNF-related matrix-associated actin-dependent regulator of chromatin subfamily A member 5 OS=Mus musculus OX=10090 GN=Smarca5 PE=1 SV=1	0.278594	1.38477	0.0412319	8.30378	8.19574	8.44997	8.69174	8.60288	8.49065	8.3165	8.59509	0.278594			+						10	2	3	8	2	0	2	248	27.8	5.01	19.959	56	0	5511
Q9ESY9	Gamma-interferon-inducible lysosomal thiol reductase OS=Mus musculus OX=10090 GN=Ifi30 PE=1 SV=3	0.717743	1.38353	0.0413494	5.99095	6.42459	6.02237	6.50462	7.18686	6.89966	6.14597	6.86371	0.717743									27	3	3	4	3	0	3	113	13	7.17	7.92	0	0	3593
Q3TRM8	Hexokinase-3 OS=Mus musculus OX=10090 GN=Hk3 PE=1 SV=2	1.20047	1.37935	0.0417497	8.71596	8.16138	8.48099	8.92422	10.1553	9.8802	8.45278	9.65325	1.20047									21	6	6	8	3	0	1	376	42.6	6.64	24.5	90	0	2289
Q9CQ22	Ragulator complex protein LAMTOR1 OS=Mus musculus OX=10090 GN=Lamtor1 PE=1 SV=1	0.940812	1.37904	0.0417796	6.37678	6.54071	6.61471	6.83542	7.82782	7.69139	6.51073	7.45154	0.940812			+						46	33	34	86	1	0	0	870	96.8	5.64	216.069	1045	0	4336
P01921	H-2 class II histocompatibility antigen, A-D beta chain OS=Mus musculus OX=10090 GN=H2-Ab1 PE=1 SV=1	1.90789	1.37414	0.0422531	4.37851	3.81762	3.66676	6.99095	5.70321	4.89239	3.9543	5.86219	1.90789									38	7	10	24	5	0	0	128	13.5	10.58	40.067	333	0	202
Q8C129	Leucyl-cystinyl aminopeptidase OS=Mus musculus OX=10090 GN=Lnpep PE=1 SV=1	0.288205	1.37103	0.0425565	8.22545	8.02735	8.02514	8.47735	8.42585	8.23936	8.09265	8.38085	0.288205			+	+					4	3	3	3	3	0	1	889	99.3	6.05	7.481	26	0	4183
Q9DCZ4	MICOS complex subunit Mic26 OS=Mus musculus OX=10090 GN=Apoo PE=1 SV=2	-0.484797	1.36447	0.0432042	6.92481	6.69349	7.02237	6.1416	6.44626	6.59842	6.88022	6.39543	-0.484797			+	+					31	18	22	59	18	0	5	568	63.6	9.1	101.44	653	0	1211
Q9CR51	V-type proton ATPase subunit G 1 OS=Mus musculus OX=10090 GN=Atp6v1g1 PE=1 SV=3	1.1846	1.3635	0.0433014	7.49105	7.61912	7.59768	7.95478	9.05066	9.25621	7.56928	8.75388	1.1846			+						1	4	4	8	4	0	2	3707	398	6.32	12.632	136	0	4949
O89016	ATP-binding cassette sub-family D member 4 OS=Mus musculus OX=10090 GN=Abcd4 PE=1 SV=2	0.666909	1.36128	0.0435233	5.38198	5.18982	5.41278	6.41616	5.6865	5.88264	5.32819	5.9951	0.666909									56	40	62	246	30	12	30	565	61.7	6.61	355.071	4113	0	4112
Q8WUR0	Protein C19orf12 homolog OS=Mus musculus OX=10090 PE=1 SV=1	-0.6491	1.35804	0.0438488	5.38888	4.85798	5.1334	4.7761	4.21723	4.43962	5.12675	4.47765	-0.6491									19	6	6	10	5	0	5	295	35.1	5.76	27.392	95	0	2778
Q3UFY8	tRNA methyltransferase 10 homolog C OS=Mus musculus OX=10090 GN=Trmt10c PE=1 SV=2	0.9411	1.35584	0.0440714	3.926	4.57894	4.37851	NaN	5.40939	5.06178	4.29448	5.23558	0.9411									12	2	2	3	2	0	0	200	22.6	5.94	15.778	81	0	247
D3Z6I4	Quinone oxidoreductase-like protein 1 OS=Mus musculus OX=10090 GN=Cryzl1 PE=1 SV=1	0.463399	1.35421	0.0442373	5.63517	5.88753	5.80735	6.43796	6.31651	5.96578	5.77668	6.24008	0.463399									1	1	1	1	1	0	0	1036	119.5	8.7	3.836	0	0.002	1188
Q8BXA1	Golgi integral membrane protein 4 OS=Mus musculus OX=10090 GN=Golim4 PE=1 SV=1	0.523806	1.35287	0.0443742	8.06555	7.85922	7.50938	8.17692	8.43505	8.39361	7.81138	8.33519	0.523806		Acetyl [N-Term]							31	10	10	15	8	2	6	350	40.1	6.67	43.042	228	0	2186
A2CEL1	Major urinary protein 1 OS=Mus musculus OX=10090 GN=Mup1 PE=3 SV=1	-1.36046	1.35239	0.0444237	9.8586	8.31877	9.51728	7.9571	7.88996	7.7662	9.23155	7.87109	-1.36046			+						10	9	9	20	9	0	6	1018	115.5	7.39	42.247	295	0	1311
Q8VD75	Huntingtin-interacting protein 1 OS=Mus musculus OX=10090 GN=Hip1 PE=1 SV=2	0.65352	1.34902	0.0447694	4.06178	3.7866	3.89724	4.16993	4.89239	4.64386	3.9152	4.56872	0.65352									9	11	11	15	2	9	2	1338	150.6	5.91	42.99	167	0	504
Q9EQ06	Estradiol 17-beta-dehydrogenase 11 OS=Mus musculus OX=10090 GN=Hsd17b11 PE=1 SV=1	1.01136	1.3446	0.0452273	10.1621	9.04876	9.47938	10.8029	10.3306	10.5909	9.56343	10.5748	1.01136		Acetyl [N-Term]							45	12	14	38	3	0	3	277	31.3	5.74	65.873	606	0	2399
P70694	Estradiol 17 beta-dehydrogenase 5 OS=Mus musculus OX=10090 GN=Akr1c6 PE=1 SV=1	-0.458091	1.34165	0.0455355	11.4315	11.211	11.2568	11.1018	10.601	10.8223	11.2998	10.8417	-0.458091									3	2	2	7	1	0	1	621	69.8	7.23	4.871	34	0	4399
A0A0R4J187	X-ray repair cross-complementing protein 6 OS=Mus musculus OX=10090 GN=Xrcc6 PE=1 SV=1	0.607231	1.33968	0.0457428	4.20945	4.59694	4.80735	5.36807	5.10852	4.95884	4.53791	5.14515	0.607231		Acetyl [N-Term]							10	1	2	3	1	0	1	79	9.1	5.83	2.954	41	0.003	5327
Q9CWU9	Nucleoporin Nup37 OS=Mus musculus OX=10090 GN=Nup37 PE=1 SV=2	-0.351535	1.33932	0.04578	6.67101	6.24793	6.43796	6.09381	6.12102	6.08746	6.4523	6.10076	-0.351535			+	+					6	7	8	12	7	0	0	1701	183.5	6.68	34.753	191	0	2151
P55096	ATP-binding cassette sub-family D member 3 OS=Mus musculus OX=10090 GN=Abcd3 PE=1 SV=2	-0.921776	1.33756	0.0459661	11.6341	10.5576	11.3515	10.2709	10.2402	10.2668	11.1811	10.2593	-0.921776									6	2	2	3	2	0	0	436	46.9	4.41	8.525	18	0	612
Q8BH51	Cytochrome c oxidase assembly protein COX14 OS=Mus musculus OX=10090 GN=Cox14 PE=3 SV=1	-0.504713	1.33699	0.0460272	8.08321	7.69975	7.93251	7.13134	7.49105	7.57894	7.90516	7.40044	-0.504713									16	2	2	2	2	0	1	130	15	5.02	7.7	45	0	2770
Q5BL07	Peroxisome biogenesis factor 1 OS=Mus musculus OX=10090 GN=Pex1 PE=1 SV=2	-0.66313	1.33667	0.0460607	5.38198	4.64962	5.04002	4.16993	4.45286	4.45943	5.02387	4.36074	-0.66313									4	1	1	1	1	0	0	297	34.6	8.44	4.725	26	0	2429
Q99P30	Peroxisomal coenzyme A diphosphatase NUDT7 OS=Mus musculus OX=10090 GN=Nudt7 PE=1 SV=2	-1.9193	1.3323	0.046526	9.7848	8.78169	10.3984	6.77742	8.30652	8.12309	9.65497	7.73567	-1.9193									3	1	1	1	1	0	0	345	38.3	5.24	3.562	20	0.002	1414
P14206	40S ribosomal protein SA OS=Mus musculus OX=10090 GN=Rpsa PE=1 SV=4	-0.306158	1.3322	0.0465369	10.9566	11.0338	10.7225	10.512	10.6945	10.5879	10.9043	10.5981	-0.306158			+						6	5	5	11	4	0	0	917	101.8	6.67	18.374	136	0	2607
Q80TM9	Nischarin OS=Mus musculus OX=10090 GN=Nisch PE=1 SV=2	0.169751	1.33212	0.0465453	5.24031	5.1416	5.29278	5.45943	5.32193	5.40259	5.2249	5.39465	0.169751									11	2	2	3	2	0	2	172	19.3	5.54	7.517	47	0	1232
Q3THG9	Alanyl-tRNA editing protein Aarsd1 OS=Mus musculus OX=10090 GN=Aarsd1 PE=1 SV=2	-0.28341	1.33147	0.0466152	6.3505	6.62498	6.50938	6.2724	6.0917	6.27053	6.49495	6.21154	-0.28341									30	16	19	53	16	0	16	624	66.5	8.5	94.291	829	0	1744
Q7TS64	G protein-coupled receptor kinase OS=Mus musculus OX=10090 GN=Grk2 PE=1 SV=1	0.50679	1.33126	0.046638	5.6865	5.6865	5.69488	5.8802	6.49665	6.2114	5.68929	6.19608	0.50679									39	15	18	42	14	1	7	418	46.9	5.16	137.774	1241	0	2656
Q9D5T0	ATPase family AAA domain-containing protein 1 OS=Mus musculus OX=10090 GN=Atad1 PE=1 SV=1	-0.483091	1.32967	0.0468086	7.45121	7.10434	7.11166	6.824	6.49185	6.90207	7.2224	6.73931	-0.483091									48	13	14	26	13	0	4	303	33.4	7.15	64.158	347	0	4373
Q810A7	ATP-dependent RNA helicase DDX42 OS=Mus musculus OX=10090 GN=Ddx42 PE=1 SV=3	0.431283	1.32965	0.0468108	4.24793	4.14568	4.47249	4.9542	4.60881	4.59694	4.2887	4.71998	0.431283									21	12	13	22	12	0	1	650	72.4	5.35	47.878	236	0	5014
P16110	Galectin-3 OS=Mus musculus OX=10090 GN=Lgals3 PE=1 SV=3	1.55318	1.32596	0.0472108	9.17018	9.5795	9.38068	9.91498	11.7329	11.142	9.37679	10.93	1.55318									35	18	19	47	13	5	12	541	61.4	6.76	93.23	710	0	4303
F8VQC1	Signal recognition particle subunit SRP72 OS=Mus musculus OX=10090 GN=Srp72 PE=1 SV=1	-0.401547	1.32352	0.0474771	9.26632	9.11244	9.20139	8.53099	8.98157	8.86295	9.19338	8.79184	-0.401547									6	4	4	6	4	0	0	739	81.3	5.3	13.629	41	0	3047
Q91XL1	Leucine-rich HEV glycoprotein OS=Mus musculus OX=10090 GN=Lrg1 PE=1 SV=1	1.12044	1.32251	0.0475876	3.79701	3.12102	3.30743	NaN	4.22497	4.83289	3.40849	4.52893	1.12044									12	3	3	8	3	0	0	289	33.2	5.45	17.558	160	0	3776
E9Q5L2	Inter alpha-trypsin inhibitor, heavy chain 4 OS=Mus musculus OX=10090 GN=Itih4 PE=1 SV=1	0.558157	1.3213	0.0477198	5.94251	5.79961	5.52042	6.60733	6.08746	6.24222	5.75418	6.31234	0.558157									38	15	17	30	15	0	10	360	42.2	7.87	86.402	390	0	961
P01900	H-2 class I histocompatibility antigen, D-D alpha chain OS=Mus musculus OX=10090 GN=H2-D1 PE=1 SV=1	0.43786	1.3206	0.0477967	10.8869	10.9888	11.085	11.6137	11.5193	11.1413	10.9869	11.4248	0.43786		Acetyl [N-Term]	+						29	6	6	8	6	0	0	261	29.7	5.58	24.859	152	0	1808
Q9Z0J0	NPC intracellular cholesterol transporter 2 OS=Mus musculus OX=10090 GN=Npc2 PE=1 SV=1	0.72824	1.3153	0.0483839	5.00899	5.37851	4.93074	5.71699	6.25927	5.52669	5.10608	5.83432	0.72824									45	23	28	74	23	0	17	606	66.4	6.6	184.286	1176	0	748
Q60875	Rho guanine nucleotide exchange factor 2 OS=Mus musculus OX=10090 GN=Arhgef2 PE=1 SV=4	0.517989	1.31344	0.0485918	6.23649	6.72656	6.29278	6.77742	7.12309	6.90929	6.41861	6.9366	0.517989									4	1	1	1	1	0	0	238	28	7.11	2.37	22	0.009	972
Q8BMK4	Cytoskeleton-associated protein 4 OS=Mus musculus OX=10090 GN=Ckap4 PE=1 SV=2	0.735227	1.31238	0.0487102	6.3733	7.01458	6.63081	7.21237	7.77742	7.23458	6.6729	7.40812	0.735227			+						7	3	3	4	3	0	3	661	74.3	5.88	14.888	65	0	3768
P34960	Macrophage metalloelastase OS=Mus musculus OX=10090 GN=Mmp12 PE=1 SV=3	2.17182	1.31181	0.048774	8.62461	8.17193	8.33047	12.0043	10.2184	9.41975	8.37567	10.5475	2.17182									56	30	39	119	27	0	19	452	50.9	8.69	204.602	1489	0	2863
Q8BI84	Transport and Golgi organization protein 1 homolog OS=Mus musculus OX=10090 GN=Mia3 PE=1 SV=2	0.292827	1.31162	0.0487952	8.77116	8.56643	8.6872	8.90268	8.86233	9.13827	8.67493	8.96776	0.292827									6	4	4	12	2	0	1	548	61	5.96	20.288	244	0	3427
O70318	Band 4.1-like protein 2 OS=Mus musculus OX=10090 GN=Epb41l2 PE=1 SV=2	0.545639	1.31116	0.0488471	4.6837	4.48543	4.43962	5.39917	5.07039	4.7761	4.53625	5.08189	0.545639			+						7	4	4	4	4	0	0	606	68.5	6.42	13.192	87	0	3432
P21447	ATP-dependent translocase ABCB1 OS=Mus musculus OX=10090 GN=Abcb1a PE=1 SV=3	1.02267	1.31038	0.0489352	5.55766	6.14771	5.89482	7.52591	6.66818	6.47411	5.86673	6.8894	1.02267			+						4	3	3	4	3	0	0	731	81.6	7.02	9.127	41	0	2166
Q9QXH4	Integrin alpha-X OS=Mus musculus OX=10090 GN=Itgax PE=1 SV=1	0.876479	1.30887	0.049105	7.28263	6.61618	7.03012	8.09856	8.09961	7.36019	6.97631	7.85279	0.876479		Acetyl [N-Term]	+	+					4	2	3	11	2	0	0	516	57.1	4.97	6.498	100	0	2603
B1APX2	RIKEN cDNA 5031439G07 gene OS=Mus musculus OX=10090 GN=5031439G07Rik PE=1 SV=1	1.68768	1.30783	0.0492231	NaN	4.14568	3.37851	NaN	5.51412	5.38543	3.76209	5.44978	1.68768									7	2	2	4	2	0	2	400	46.4	5.36	8.677	47	0	2677
A0A0U1RQ20	Apoptosis-associated speck-like protein-containing a CARD (Fragment) OS=Mus musculus OX=10090 GN=Pycard PE=1 SV=1	0.963832	1.30305	0.0497684	4.56682	5.1416	4.67807	NaN	6.0268	5.49185	4.79549	5.75933	0.963832		Acetyl [N-Term]							75	62	123	559	2	0	1	375	41.8	5.48	994.397	13379	0	5030
