# Supplementary material for: Proteomic Analysis of Niemann-Pick Type C Hepatocytes Reveals Potential Therapeutic Targets for Liver Damage
Source: Cells. 2021 Aug 21;10(8):2159. doi: 10.3390/cells10082159 (PMC8392304; doi:10.3390/cells10082159)
Supplement: Supplementary file 1 [file cells-10-02159-s001.zip › Supplementary Table_2.xlsx]

## Sheet: Supplementary Table 2
	log2 norm. Abundance WT01	log2 norm. Abundance WT02	log2 norm. Abundance WT03	log2 norm. Abundance KO01	log2 norm. Abundance KO02	log2 norm. Abundance KO03	log2 fold change ko/wt
Mup22	6.81634	5.59991	5.62059	2.72247	2.72247	3.64386	-2.82912
Npc1	9.28656	8.55612	8.78921	7.61102	6.62644	6.59096	-1.93449
Nudt7	9.7848	8.78169	10.3984	6.77742	8.30652	8.12309	-1.9193
Mup1	9.8586	8.31877	9.51728	7.9571	7.88996	7.7662	-1.36046
Comt	10.8314	10.0348	10.3825	9.09276	9.12309	9.07948	-1.31779
Hsd17b2	11.1939	10.571	10.4092	9.70096	9.27356	9.47978	-1.23992
Gpnmb	5.99548	6.0917	5.65249	6.75889	7.43379	6.55766	1.00356
Hsd17b11	10.1621	9.04876	9.47938	10.8029	10.3306	10.5909	1.01136
Fermt3	7.3637	7.53993	7.35138	7.92005	8.89087	8.50859	1.0215
Anxa5	11.4384	11.4768	11.3762	12.5117	12.5044	12.3425	1.02241
Abcb1a	5.55766	6.14771	5.89482	7.52591	6.66818	6.47411	1.02267
Rhog	6.38198	6.83668	6.83162	7.36982	8.08852	7.67243	1.02683
Tfrc	9.55286	9.26068	9.25786	10.2315	10.5676	10.4025	1.04337
Ugt1a7c	3.79701	3.87774	3.58496	4.62644	5.12515	4.64962	1.04716
Ccz1	6.12309	5.41954	5.40939	6.75355	6.73471	6.64818	1.06147
1	7.03012	7.19279	7.04767	8.61434	7.76155	8.09223	1.06585
Slc39a1	3.71149	4.04439	3.63227	4.9542	4.51096	5.1416	1.07287
Tlr3	4.67243	5.62644	5.39232	6.40088	6.26491	6.2555	1.0767
Lamtor2	6.11894	6.25361	6.2384	6.92837	7.53216	7.38284	1.07747
Bche	6.91767	7.43379	6.99774	7.84925	8.10486	8.64205	1.08232
Atp6v1e1	8.79636	8.91019	8.96751	9.507	10.3244	10.1093	1.08888
Mrpl27	4.39917	3.96347	4.43962	5.90207	5.07039	5.11686	1.09569
Gnai2	8.7445	8.79734	8.88783	9.86155	10.2031	9.65839	1.09779
Arsb	5.43296	4.50462	4.91648	6.07468	6.11061	5.99322	1.10815
Oas1a	8.08481	8.63408	8.39532	9.76802	9.50641	9.19599	1.11873
Lrg1	3.79701	3.12102	3.30743	4.22497	4.22497	4.83289	1.12044
Atp6v1b2	9.46046	9.35997	9.5467	9.95928	11.0731	10.7083	1.12451
Slc38a7	6.53761	6.63807	6.63807	8.12928	7.52826	7.56986	1.13788
Pi4k2a	7.39917	6.82528	7.15684	8.37156	8.31016	8.1153	1.13858
Lmbrd1	6.1918	6.49346	6.3345	8.14975	7.18785	7.10852	1.14212
Aif1	4.30743	4.79701	4.17792	5.54535	5.2817	5.89239	1.14569
Mical1	4.91169	5.27053	4.57894	5.7761	6.38888	6.03782	1.14721
Slc29a3	5.48543	5.29278	5.57592	6.46761	6.92955	6.40429	1.14911
Serpinf2	6.06393	6.11061	5.81506	7.32193	6.88264	7.27984	1.16493
Ncf2	6.21723	6.18982	6.08958	6.6851	7.87406	7.45204	1.17152
Plbd2	7.16088	7.40599	7.507	9.09882	8.33092	8.17542	1.1771
Myof	10.3826	10.426	10.26	11.6087	11.9622	11.039	1.18044
Atp6ap1	6.58045	6.42459	6.77215	8.24935	7.60881	7.47249	1.18449
Atp6v1g1	7.49105	7.61912	7.59768	7.95478	9.05066	9.25621	1.1846
Atp6v1c1	9.61287	9.48382	9.64476	10.2267	11.218	10.8618	1.18832
Cln3	4.10434	4.40599	4.59694	5.92362	5.41278	5.34696	1.19203
Hk3	8.71596	8.16138	8.48099	8.92422	10.1553	9.8802	1.20047
Unc93b1	4.36457	3.07039	3.94486	5.1127	5	4.87774	1.20354
Gltp	7.55152	8.29692	7.96924	8.84204	9.45162	9.17692	1.21764
Slc35f6	6.55305	7.27333	7.00562	8.23649	8.21626	8.03892	1.21989
Cybb	7.18587	6.89239	6.96347	8.48261	8.48502	7.73674	1.22088
Pld3	5.848	6.50779	6.40939	7.32553	7.78136	7.33985	1.22719
Serinc1	7.67313	7.19574	7.34873	9.18264	8.39789	8.39318	1.25204
Apoa4	7.75556	7.0917	7.35138	8.66463	8.48341	8.81954	1.25631
Atp6v1a	9.81234	9.74298	9.88692	10.6007	11.4216	11.2288	1.26963
Psen2	6.00675	5.79961	5.79442	7.67878	6.85175	6.89239	1.27405
Nceh1	8.3837	8.05853	8.18438	9.21018	9.96347	9.33069	1.29258
Uba3	5.79701	6.54535	6.45286	7.2384	8.01848	7.42878	1.29681
Chil3	5.33628	5.24793	5.06178	6.23074	6.91289	6.39746	1.29837
Trpv2	5.16993	4.82782	4.99095	6.56072	6.52356	5.79961	1.29839
Dock2	6.732	6.62059	6.69349	8.21043	8.03452	7.70667	1.30185
Cd36	8.14211	8.27891	8.23218	9.33092	9.92214	9.3147	1.30485
Atp6v0d1	10.5666	9.60899	9.92318	11.8945	11.0635	11.0739	1.311
Bcat2	4.20945	4.88753	5.04002	5.8802	6.47249	5.76022	1.3253
Hpcal1	8.02625	8.09698	7.90929	8.94017	9.62297	9.44977	1.32679
Naga	8.00282	7.91049	8.0607	9.49366	9.34119	9.12645	1.32909
Mpo	6.54071	6.24793	6.2891	7.49745	7.91946	7.68018	1.33979
Sdcbp	6.21723	6.42459	6.41954	7.94953	7.83794	7.30834	1.34482
Nckap1l	6.16591	6.37851	6.29829	7.48301	7.81634	7.57818	1.34494
Akr1b10	3.6893	4.46597	3.58496	4.67807	5.7252	5.39232	1.35178
Grn	6.48059	7.25077	7.1179	8.1127	8.88539	7.94251	1.36378
Jchain	3.848	3.30743	3.52356	5.51728	4.3505	4.90689	1.36523
Rragc	7.55919	7.65821	7.79766	9.22665	8.96203	8.93752	1.37038
Fmo2	6.72792	7.06286	7.24222	8.94281	7.84549	8.37808	1.37779
Glmp	5.16189	5.52669	5.22497	7.20848	6.35931	6.50303	1.38576
Rac2	6.32193	6.05961	5.68089	7.06501	7.90749	7.27146	1.39385
Arl8a	6.2854	6.69766	6.36457	7.67243	8.11166	7.74551	1.39398
Ctsb	10.5979	10.5994	10.7058	11.7791	12.3443	11.9744	1.39824
Ncf4	6.22689	6.03342	5.95652	6.88509	7.96694	7.57592	1.4037
Fcgr1	5.83036	5.66107	5.44626	7.58421	7.0607	6.51096	1.40606
Hp	9.09408	9.57837	9.48884	10.3848	10.87	11.1275	1.40698
Rab8b	6.52513	6.58045	6.24982	7.07039	8.58158	7.94369	1.41342
Acp2	8.30241	7.74483	7.97499	9.90554	9.30058	9.05853	1.41414
Lamtor5	4	3.39232	4.41954	4.848	5.52982	5.70598	1.42398
Gusb	9.19451	9.44108	9.69244	10.6242	11.129	10.8831	1.43609
Ttr	8.47005	8.87774	8.60511	9.98442	10.0308	10.3199	1.46074
Pttg1ip	8.28725	8.16591	8.27006	9.91901	9.74819	9.45677	1.46692
Rgs10	3.49825	3.26303	2.7866	5.00899	5.00899	4.30743	1.47558
Casp1	5.25927	5.61765	5.81506	6.53294	7.46352	7.19574	1.50007
Alox5ap	4.10434	4.21723	4.08746	5.30378	6.36982	5.25172	1.50543
Arl8b	8.20897	8.43921	8.29921	9.63408	10.245	9.63263	1.52143
Lamp2	10.2687	9.75556	9.80155	12.0156	11.2505	11.1298	1.52339
Vav1	6.43796	6.43962	6.39746	7.92837	8.12877	7.79116	1.52442
Spns1	4.10434	4.74953	5.18982	6.65964	5.77873	6.1819	1.52553
Cd68	7.88081	8.1236	8.06124	9.1533	10.032	9.48744	1.53571
Gns	8.1634	8.79636	9.19918	10.2092	10.4444	10.1211	1.5386
Cd48	4.41954	3.58496	3.53605	5.91169	5.56682	4.6893	1.54242
Cst3	3.926	2.90689	3.41954	5.82273	4.59694	4.49185	1.55303
Lgals3	9.17018	9.5795	9.38068	9.91498	11.7329	11.142	1.55318
Lipa	6.67807	6.79442	6.86542	8.14975	8.56948	8.28494	1.55542
Hexb	8.50303	8.51531	8.44874	10.1624	10.115	9.89558	1.56865
Tmem106b	8.33271	7.66249	7.90268	10.1904	9.14185	9.2854	1.57327
Man2b1	8.65535	8.7492	9.00871	10.6833	10.2708	10.1797	1.5735
Vat1	10.2169	10.1988	10.442	11.348	12.2898	11.9523	1.57745
Npl	7.47168	7.76089	7.38888	8.5672	9.33918	9.44853	1.57782
Coro1a	7.82273	7.76487	7.46352	8.42375	9.96506	9.41215	1.58328
Niban2	8.79149	8.99209	8.86047	10.0519	10.923	10.4302	1.58702
Tcirg1	10.1738	9.67172	9.84533	11.8541	11.4114	11.3189	1.63114
Msr1	7.43796	7.59021	7.54535	9.55785	9.28979	8.65392	1.64268
5031439G07Rik	4.14568	4.14568	3.37851	5.51412	5.51412	5.38543	1.68768
Atp6v0c	8.96347	7.69349	8.4417	10.4363	9.73013	9.99661	1.68813
Adgre1	4.08746	4.76553	4.45943	6.58045	6.44294	5.37851	1.69649
Cyp4a10	6.15583	6.40429	6.38716	8.6453	7.6907	7.75087	1.7132
Lalba	4.65535	4.09592	3.96347	5.57289	6.58195	5.74953	1.72988
Ncstn	9.0983	7.99039	8.40599	10.9169	9.83747	9.93162	1.73045
P2rx4	9.46312	9.18413	9.30195	11.1644	11.2114	10.7918	1.73947
Lhfpl2	4.41954	4.21723	3.62059	6.12309	6.25927	5.10852	1.74451
Acp5	6.45121	6.62059	6.64241	8.76354	8.28586	7.90689	1.74736
Sppl2a	7.32912	6.76686	7.19574	9.43108	8.4508	8.6632	1.75112
Plek	6.55766	6.84423	6.7866	9.20701	8.31877	7.91707	1.75146
Oxct1	6.51254	6.04002	6.48382	7.33002	8.83099	8.13597	1.75353
Stard3	4.20945	4.27798	4.37851	6.56072	5.73064	5.86047	1.76196
Mfsd8	4.08746	2.65535	3.18587	5.88996	4.46597	4.87283	1.76669
Dpp7	7.62644	7.38111	8.02459	9.49905	9.47978	9.37743	1.77471
Cpq	7.96809	8.40897	8.44045	10.3335	9.91871	9.90373	1.77948
Creg1	7.12619	7.55842	8.05365	9.39596	9.44646	9.23793	1.7807
Ptprc	8.34518	8.43671	8.28771	10.4311	10.3924	9.59638	1.78342
Napsa	5.87529	5.17792	5.2817	8.08905	6.85549	6.83794	1.81586
Atp6ap2	5.54844	4.73335	5.15785	7.28077	6.81762	6.79571	1.81816
Syngr1	4.19377	4.34341	4.47249	5.64097	6.87283	5.96578	1.8233
Atraid	6.76951	5.37851	5.82273	8.62242	7.3672	7.48623	1.83503
Rftn1	2.74416	3.21723	3.23266	5.54535	4.98185	4.17792	1.83702
Psap	9.44522	9.54284	9.50263	10.9943	12.0317	10.9765	1.83726
Ctsd	10.2626	10.5887	10.9349	11.8204	13.0111	12.4865	1.84392
Aldh3b1	5.78921	5.76022	6.30925	8.03342	7.98925	7.43045	1.86482
Ctsh	7.37243	7.56072	7.61618	9.37547	9.55459	9.27566	1.88547
H2-Ab1	4.37851	3.81762	3.66676	6.99095	5.70321	4.89239	1.90789
Cd84	6.3733	6.13545	5.84298	8.22545	8.38716	7.4733	1.91139
Slc7a8	6.44626	6.29278	6.15785	8.6388	8.31696	7.68018	1.91302
Slc17a5	6.15583	5.73606	5.80478	8.49705	7.35138	7.60511	1.91896
Cd63	8.08321	9.34207	9.62169	10.4618	11.6382	10.7211	1.92469
Cyp4a14	8.37808	8.17493	8.25503	10.8191	9.81041	10.0291	1.95022
Apobec1	4.20945	3.43296	4.03562	6.12309	5.70874	5.71699	1.95693
Ctsz	9.30902	9.48804	9.77939	11.4138	11.6896	11.3882	1.97171
Lyz2	7.25361	7.34163	7.10014	8.60437	10.1034	8.92511	1.97917
Lamp1	10.0905	9.45635	9.57686	12.3887	11.5107	11.4243	2.06665
Gng2	3.53605	2.848	2.848	5.64097	5.26679	4.91648	2.08272
Itgb2	8.1236	7.73064	7.83289	10.2042	10.3701	9.37829	2.0885
Anxa1	9.34829	9.1046	9.20604	10.9186	11.9363	11.2994	2.16514
Mmp12	8.62461	8.17193	8.33047	12.0043	10.2184	9.41975	2.17182
Slc43a2	3.07039	3.07039	2.926	5.74147	5.32912	4.62644	2.23415
Atp6v0d2	5.70598	4.23266	5.40259	7.19081	7.82273	7.16892	2.28041
Lilrb4	4.24793	3.62059	3.74416	6.94369	6.24413	5.32553	2.30022
Fabp4	6.89966	7.53993	7.10643	8.06555	10.3819	10.0686	2.32335
Slc66a3	2.848	3.51096	3.74416	5.51728	6.09592	5.57289	2.36099
Ctss	4.56682	5.0917	4.64386	6.6851	7.86851	6.86171	2.37098
Slc37a2	4.75489	4.12102	4.49185	5.54535	8.11374	6.83416	2.37516
S100a1	6.35403	7.22497	6.61029	8.43129	10.1227	9.61232	2.65901
Leprot	3.36457	2.88753	2.88753	6.38543	5.853	5.37156	2.74395
Cd200	3.12102	3.43296	2.926	6.56682	6.2555	5.32912	2.89049
