# Supplementary material for: Proteomic Analysis of Niemann-Pick Type C Hepatocytes Reveals Potential Therapeutic Targets for Liver Damage
Source: Cells. 2021 Aug 21;10(8):2159. doi: 10.3390/cells10082159 (PMC8392304; doi:10.3390/cells10082159)
Supplement: Supplementary file 1 [file cells-10-02159-s001.zip › Supplementary Table_4.xlsx]

## Sheet: Supplementary Table 4
	log2 norm. Abundance WT01	log2 norm. Abundance WT02	log2 norm. Abundance WT03	log2 norm. Abundance KO01	log2 norm. Abundance KO02	log2 norm. Abundance KO03	log2 fold change ko/wt
Npc1	9.28656	8.55612	8.78921	7.61102	6.62644	6.59096	-1.93449	Lysosomal
Ccz1	6.12309	5.41954	5.40939	6.75355	6.73471	6.64818	1.06147	proteins
Lamtor2	6.11894	6.25361	6.2384	6.92837	7.53216	7.38284	1.07747
Arsb	5.43296	4.50462	4.91648	6.07468	6.11061	5.99322	1.10815
Lmbrd1	6.1918	6.49346	6.3345	8.14975	7.18785	7.10852	1.14212
Slc29a3	5.48543	5.29278	5.57592	6.46761	6.92955	6.40429	1.14911
Plbd2	7.16088	7.40599	7.507	9.09882	8.33092	8.17542	1.1771
Atp6v1g1	7.49105	7.61912	7.59768	7.95478	9.05066	9.25621	1.1846
Cln3	4.10434	4.40599	4.59694	5.92362	5.41278	5.34696	1.19203
Unc93b1	4.36457	3.07039	3.94486	5.1127	5	4.87774	1.20354
Slc35f6	6.55305	7.27333	7.00562	8.23649	8.21626	8.03892	1.21989
Pld3	5.848	6.50779	6.40939	7.32553	7.78136	7.33985	1.22719
Atp6v0d1	10.5666	9.60899	9.92318	11.8945	11.0635	11.0739	1.311
Naga	8.00282	7.91049	8.0607	9.49366	9.34119	9.12645	1.32909
Mpo	6.54071	6.24793	6.2891	7.49745	7.91946	7.68018	1.33979
Grn	6.48059	7.25077	7.1179	8.1127	8.88539	7.94251	1.36378
Rragc	7.55919	7.65821	7.79766	9.22665	8.96203	8.93752	1.37038
Glmp	5.16189	5.52669	5.22497	7.20848	6.35931	6.50303	1.38576
Arl8a	6.2854	6.69766	6.36457	7.67243	8.11166	7.74551	1.39398
Ctsb	10.5979	10.5994	10.7058	11.7791	12.3443	11.9744	1.39824
Acp2	8.30241	7.74483	7.97499	9.90554	9.30058	9.05853	1.41414
Lamtor5	4	3.39232	4.41954	4.848	5.52982	5.70598	1.42398
Gusb	9.19451	9.44108	9.69244	10.6242	11.129	10.8831	1.43609
Arl8b	8.20897	8.43921	8.29921	9.63408	10.245	9.63263	1.52143
Lamp2	10.2687	9.75556	9.80155	12.0156	11.2505	11.1298	1.52339
Cd68	7.88081	8.1236	8.06124	9.1533	10.032	9.48744	1.53571
Gns	8.1634	8.79636	9.19918	10.2092	10.4444	10.1211	1.5386
Cst3	3.926	2.90689	3.41954	5.82273	4.59694	4.49185	1.55303
Lipa	6.67807	6.79442	6.86542	8.14975	8.56948	8.28494	1.55542
Hexb	8.50303	8.51531	8.44874	10.1624	10.115	9.89558	1.56865
Man2b1	8.65535	8.7492	9.00871	10.6833	10.2708	10.1797	1.5735
Acp5	6.45121	6.62059	6.64241	8.76354	8.28586	7.90689	1.74736
Sppl2a	7.32912	6.76686	7.19574	9.43108	8.4508	8.6632	1.75112
Stard3	4.20945	4.27798	4.37851	6.56072	5.73064	5.86047	1.76196
Mfsd8	4.08746	2.65535	3.18587	5.88996	4.46597	4.87283	1.76669
Dpp7	7.62644	7.38111	8.02459	9.49905	9.47978	9.37743	1.77471
Cpq	7.96809	8.40897	8.44045	10.3335	9.91871	9.90373	1.77948
Atp6ap2	5.54844	4.73335	5.15785	7.28077	6.81762	6.79571	1.81816
Psap	9.44522	9.54284	9.50263	10.9943	12.0317	10.9765	1.83726
Ctsd	10.2626	10.5887	10.9349	11.8204	13.0111	12.4865	1.84392
Ctsh	7.37243	7.56072	7.61618	9.37547	9.55459	9.27566	1.88547
Slc17a5	6.15583	5.73606	5.80478	8.49705	7.35138	7.60511	1.91896
Cd63	8.08321	9.34207	9.62169	10.4618	11.6382	10.7211	1.92469
Ctsz	9.30902	9.48804	9.77939	11.4138	11.6896	11.3882	1.97171
Lamp1	10.0905	9.45635	9.57686	12.3887	11.5107	11.4243	2.06665
Atp6v0d2	5.70598	4.23266	5.40259	7.19081	7.82273	7.16892	2.28041
Ctss	4.56682	5.0917	4.64386	6.6851	7.86851	6.86171	2.37098
Atp6v1e1	8.79636	8.91019	8.96751	9.507	10.3244	10.1093	1.08888	Mitochondrial
Mrpl27	4.39917	3.96347	4.43962	5.90207	5.07039	5.11686	1.09569	proteins
Oas1a	8.08481	8.63408	8.39532	9.76802	9.50641	9.19599	1.11873
Pi4k2a	7.39917	6.82528	7.15684	8.37156	8.31016	8.1153	1.13858
Hk3	8.71596	8.16138	8.48099	8.92422	10.1553	9.8802	1.20047
Bcat2	4.20945	4.88753	5.04002	5.8802	6.47249	5.76022	1.3253
Akr1b10	3.6893	4.46597	3.58496	4.67807	5.7252	5.39232	1.35178
Spns1	4.10434	4.74953	5.18982	6.65964	5.77873	6.1819	1.52553
Vat1	10.2169	10.1988	10.442	11.348	12.2898	11.9523	1.57745
Oxct1	6.51254	6.04002	6.48382	7.33002	8.83099	8.13597	1.75353
